# Supplementary material
Source: PubMed Central journal article supplement (PMC9620481)
Supplement: NIHMS1843526-supplement-Supplementary_Information.pdf [file NIHMS1843526-supplement-Supplementary_Information.pdf]

---

**Supplementary information**

---

**TCR-engineered T cells targeting E7 for patients with metastatic HPV-associated epithelial cancers**

---

In the format provided by the authors and unedited

## Supplementary Information PDF for:

### **TCR-engineered T cells targeting E7 for patients with metastatic HPV-associated epithelial cancers**

Nisha B. Nagarsheth, Scott M. Norberg, Andrew L. Sinkoe, Sabina Adhikary, Thomas J. Meyer, Justin B. Lack, Andrew C. Warner, Colleen Schweitzer, Stacey L. Doran, Sanja Stevanović, Cornelia L. Trimble, Jennifer A. Kanakry, Mohammad Hadi Bagheri, Erin Ferraro, Stephanie H. Astrow, Adrian Bot, William C. Faquin, David Stroncek, Nikolaos Gkitsas, Steven Highfill, Christian S. Hinrichs†

†Correspondence to: [hinrichs@nih.gov](mailto:hinrichs@nih.gov)

#### **This PDF file includes:**

- Supplemental Figure 1
- Supplementary Tables 1-3
- Supplementary Datasets 1-2
- Clinical Trial Protocol

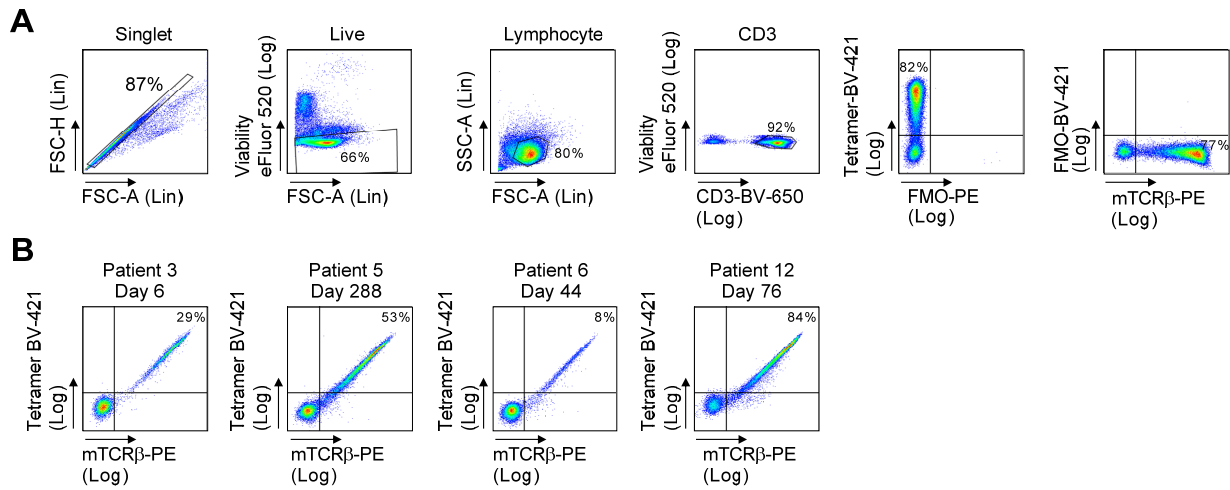

**Supplementary Figure 1. Flow cytometry gating strategy and examples.** (A) Gating strategy with fluorescence minus one (FMO) controls for determination of T cell and E7 TCR-T cell frequency in samples. mTCR $\beta$  indicates labeling with antibody against the mouse constant region of the E7 TCR. Tetramer indicates labeling with HLA-A\*02:01-E7<sub>11-19</sub> tetramers. Linear (Lin) or logarithmic (Log) scale is indicated for each axis. (B) Representative dot plots showing detection of E7 TCR-T cells in the peripheral blood. Gating is as per panel A. The patient and the day after E7 TCR-T cell infusion are indicated above each plot.



|                                       |     |     |     |     |     |
|---------------------------------------|-----|-----|-----|-----|-----|
| Acidosis                              |     |     |     |     | 3*  |
| Edema (face)                          | 1-2 |     |     |     |     |
| Demodex folliculitis                  |     |     | 1-2 |     |     |
| Dry mouth                             |     |     |     | 1-2 | 1-2 |
| Mucositis                             | 1-2 |     |     |     |     |
| Pruritis                              | 1-2 |     |     |     |     |
| Presyncope                            |     | 1-2 |     |     |     |
| Fall                                  |     | 1-2 |     |     |     |
| Inflammation (neck)                   |     | 1-2 |     |     |     |
| Sinusitis                             |     |     | 1-2 |     |     |
| Hiccups                               |     | 1-2 |     |     |     |
| Pain (hip)                            |     | 1-2 |     |     |     |
| Hypoalbumenia                         |     | 1-2 | 1-2 | 1-2 |     |
| Paresthesia                           |     |     | 1-2 |     |     |
| Epistaxis                             |     |     | 1-2 |     |     |
| CPK increased                         |     |     |     |     | 4*  |
| Pain (wrist)                          |     |     | 1-2 |     |     |
| Soft tissue necrosis                  |     |     |     |     | 4   |
| Hypothyroidism                        |     |     | 1-2 |     |     |
| Ejection fraction decreased           |     |     |     |     | 1-2 |
| Peripheral ischemia (lower extremity) |     |     |     |     | 3*  |
| Hyperkalemia                          |     |     |     |     | 3*  |
| Paresthesia                           |     |     |     |     |     |
| Edema (trunk)                         |     |     |     |     |     |
| Tremor                                |     |     |     |     | 1-2 |
| Hemorrhoidal hemorrhage               |     |     |     |     | 1-2 |
| Diplopia                              |     |     |     |     | 1-2 |
| Urinary retention                     |     |     |     |     | 1-2 |

\*Dose-limiting toxicity

<sup>†</sup>Highest grade adverse event by CTCAE version 4.03 is shown

**Supplementary Table 2. Patient biopsies**

| <b>Patient</b> | <b>Time Point</b>        | <b>Tumor site</b>         | <b>Lesion response</b> | <b>Comment</b>                                  |
|----------------|--------------------------|---------------------------|------------------------|-------------------------------------------------|
| 3              | Pretreatment (Day -25)   | Right inguinal lymph node | None                   | Pretreatment – no E7 TCR-T cells                |
| 4              | Posttreatment (Day +45)  | Right pelvic lymph node   | None                   | Failed quality control for RNAscope             |
| 5              | Pretreatment (Day -12)   | Right pleura              | Complete               | Pretreatment – no E7 TCR-T cells                |
|                | Posttreatment (Day +349) | T1–T2 vertebral body      | None                   | <i>HLA-A*02:01</i> mutation – no target complex |
| 12             | Pretreatment (Day -11)   | Rectum                    | Partial                | Pretreatment – no E7 TCR-T cells                |
|                | Pretreatment (Day -8)    | Chest wall                | Complete               | Pretreatment – no E7 TCR-T cells                |
|                | Posttreatment (Day +36)  | Rectum                    | Partial                | No tumor in specimen                            |
|                | Posttreatment (Day +77)  | Rectum                    | Partial                | No tumor in specimen                            |
|                | Posttreatment (Day +209) | Rectum                    | Partial                | <i>B2M</i> loss – no target complex             |

**Supplementary Table 3. Immune-related resistance genes**

| IPA pathway list                                  | Gene Symbol                               | Description                               |
|---------------------------------------------------|-------------------------------------------|-------------------------------------------|
| <b>"Antigen Presentation Pathway"<sup>a</sup></b> | B2M                                       | MHC I processing and presentation         |
|                                                   | CALR                                      | MHC I processing and presentation         |
|                                                   | CANX                                      | MHC I processing and presentation         |
|                                                   | HLA-A*02:01                               | MHC I processing and presentation         |
|                                                   | NLRC5                                     | MHC I processing and presentation         |
|                                                   | PDIA3                                     | MHC I processing and presentation         |
|                                                   | TAP1                                      | MHC I processing and presentation         |
|                                                   | TAP2                                      | MHC I processing and presentation         |
|                                                   | TAPBP                                     | MHC I processing and presentation         |
|                                                   | LMP2 (PSMB9)                              | MHC I processing and presentation         |
|                                                   | LMP7 (PSMB8)                              | MHC I processing and presentation         |
|                                                   | LMPX (PSMB5)                              | MHC I processing and presentation         |
|                                                   | LMPY (PSMB6)                              | MHC I processing and presentation         |
| <b>"Interferon Signaling"<sup>b</sup></b>         | MED14                                     | Interferon alpha/beta signaling           |
|                                                   | IFNAR1                                    | Interferon alpha/beta signaling           |
|                                                   | IFNAR2                                    | Interferon alpha/beta signaling           |
|                                                   | IFNGR1                                    | Interferon gamma signaling                |
|                                                   | IFNGR2                                    | Interferon gamma signaling                |
|                                                   | IRF9                                      | Interferon alpha/beta signaling           |
|                                                   | JAK1                                      | Interferon gamma and alpha/beta signaling |
|                                                   | JAK2                                      | Interferon gamma signaling                |
|                                                   | PIAS1                                     | Interferon alpha/beta signaling           |
|                                                   | SOCS1                                     | Interferon gamma signaling                |
|                                                   | STAT1                                     | Interferon gamma and alpha/beta signaling |
|                                                   | STAT2                                     | Interferon alpha/beta signaling           |
| TC-PTP (PTPN2)                                    | Interferon gamma and alpha/beta signaling |                                           |
| TYK2                                              | Interferon alpha/beta signaling           |                                           |

<sup>a</sup>Genes were filtered for involvement in the major histocompatibility complex class I pathway

<sup>b</sup>Genes were filtered for extranuclear signaling (downstream gene transcription was not included)

**Supplementary Dataset 1. (separate file).** Damaging Mutations From Tumor Samples.

**Supplementary Dataset 2. (separate file).** Copy Number Variants From Tumor Samples.



**Abbreviated Title: HPV-16 E7 TCR**  
**Version Date: 3/5/2020**

Abbreviated Title: HPV-16 E7 TCR

CC Protocol #: 16C0154 L

NCT #: NCT02858310

OSP Number: 1604-1517

IBC Number: RD-16-V-04

Version Date: March 5, 2020

**A Phase I/II Trial of T Cell Receptor Gene Therapy Targeting HPV-16 E7 for HPV-Associated Cancers**

**NCI Principal Investigator:**

Christian S. Hinrichs, MD  
National Cancer Institute  
Experimental Transplantation and Immunotherapy Branch  
10 Center Drive, Room 4B04  
Bethesda, MD 20892  
Phone: 240-760-6059  
Email: [hinrichs@nih.gov](mailto:hinrichs@nih.gov)

|              |                       |
|--------------|-----------------------|
| Drug Name:   | E7 TCR Transduced PBL |
| IND Number:  | 16959                 |
| Sponsor:     | CCR, NCI              |
| Manufacturer | CC DTM                |

**Commercial Agents:** Fludarabine, Cyclophosphamide, IL-2 (Aldesleukin)

## **PRÉCIS**

### **Background:**

- Metastatic or refractory/recurrent human papillomavirus (HPV)-16+ cancers (cervical, vulvar, vaginal, penile, anal, and oropharyngeal cancers) are incurable and poorly palliated by standard therapies.
- HPV-16+ cancers constitutively express the HPV-16 E7 oncoprotein, which is absent from healthy human tissues.
- Administration of T cell receptor (TCR) gene engineered T cells can induce objective tumor responses in certain malignancies including HPV-16+ cancers.
- T cells genetically engineered with a TCR targeting HPV-16 E7 (E7 TCR) display specific reactivity against HLA-A2+, HPV-16+ target cells.

### **Objectives:**

#### Phase I Primary Objective

- To determine a safe dose for E7 TCR cells plus aldesleukin for the treatment of metastatic HPV-16+ cancers.

#### Phase II Primary Objective

- To determine safety and efficacy of E7 TCR cells plus aldesleukin for the treatment of metastatic HPV-16+ cancers.

### **Eligibility:**

- Patients greater than or equal to 18 years old with metastatic or refractory/recurrent HPV-16+ cancer.
- Prior first line systemic therapy is required unless the patient declines standard treatment.
- Patients must be HLA-A\*02:01-positive.

### **Design:**

- This is a phase I/II clinical trial that will test the safety and efficacy of E7 TCR cells.
- All patients will receive a non-myeloablative lymphocyte-depleting preparative regimen of cyclophosphamide and fludarabine followed by a single infusion of E7 TCR cells. Cell infusion will be followed by high-dose aldesleukin.
- Re-enrollment will be allowed for a small number of subjects.

**TABLE OF CONTENTS**

**PRÉCIS**..... 2

**TABLE OF CONTENTS**..... 3

**1 INTRODUCTION**..... 6

    1.1 Study Objectives ..... 6

    1.2 Background and Rationale..... 6

**2 ELIGIBILITY ASSESSMENT AND ENROLLMENT**..... 16

    2.1 Eligibility Criteria ..... 16

    2.2 Screening Evaluation ..... 18

    2.3 Registration Procedures ..... 19

    2.4 Baseline Evaluations..... 21

**3 STUDY IMPLEMENTATION**..... 21

    3.1 Study Design..... 21

    3.2 Drug Administration..... 25

    3.3 Aldesleukin: Intravenous Administration..... 27

    3.4 Potential Repeat Treatment..... 28

    3.5 On Study Evaluation..... 28

    3.6 Post treatment Evaluation (Follow-Up)..... 29

    3.7 Criteria for Removal from Protocol Therapy and Off Study Criteria..... 30

    3.8 Schedule of Evaluations..... 32

**4 CONCOMITANT MEDICATIONS/MEASURES** ..... 34

    4.1 Infection Prophylaxis..... 34

    4.2 Other Concomitant medications to control side effects ..... 35

**5 BIOSPECIMEN COLLECTION** ..... 35

    5.1 Correlative Studies for Research ..... 35

    5.2 Gene-therapy-specific follow-up ..... 37

    5.3 Sample Storage, Tracking and Disposition..... 38

**6 DATA COLLECTION AND EVALUATION** ..... 39

    6.1 Data Collection ..... 39

|      |                                                                               |    |
|------|-------------------------------------------------------------------------------|----|
| 6.2  | Data Sharing Plans .....                                                      | 40 |
| 6.3  | Response Criteria .....                                                       | 41 |
| 6.4  | Toxicity Criteria.....                                                        | 46 |
| 7    | NIH REPORTING REQUIREMENTS/DATA AND SAFETY MONITORING PLAN ....               | 46 |
| 7.1  | Definitions.....                                                              | 46 |
| 7.2  | OHSRP Office of Compliance and Training/IRB Reporting .....                   | 46 |
| 7.3  | NCI Clinical Director Reporting.....                                          | 46 |
| 7.4  | Institutional Biosafety Committee (IBC) Reporting Criteria.....               | 47 |
| 7.5  | NIH Required Data and Safety Monitoring Plan.....                             | 48 |
| 8    | SPONSOR PROTOCOL/SAFETY REPORTING .....                                       | 48 |
| 8.1  | Definitions.....                                                              | 48 |
| 8.2  | Assessment of Safety Events .....                                             | 50 |
| 8.3  | Reporting of Serious Adverse Events.....                                      | 50 |
| 8.4  | Waiver of expedited reporting to CCR.....                                     | 50 |
| 8.5  | Safety Reporting Criteria to the Pharmaceutical Collaborators.....            | 52 |
| 8.6  | Reporting Pregnancy.....                                                      | 52 |
| 8.7  | Regulatory Reporting for Studies Conducted Under CCR-Sponsored IND.....       | 52 |
| 9    | CLINICAL MONITORING.....                                                      | 52 |
| 10   | STATISTICAL CONSIDERATIONS .....                                              | 53 |
| 11   | COLLABORATIVE AGREEMENTS.....                                                 | 54 |
| 12   | HUMAN SUBJECTS PROTECTIONS.....                                               | 54 |
| 12.1 | Rationale for Subject Selection.....                                          | 54 |
| 12.2 | Strategies/Procedures for Recruitment .....                                   | 54 |
| 12.3 | Participation of Children.....                                                | 55 |
| 12.4 | Participation of Subjects Unable to Give Consent.....                         | 55 |
| 12.5 | Evaluation of Benefits and Risks/Discomforts.....                             | 55 |
| 12.6 | Risks/Benefits Analysis .....                                                 | 56 |
| 12.7 | Consent Process and Documentation.....                                        | 56 |
| 13   | PHARMACEUTICAL INFORMATION .....                                              | 57 |
| 13.1 | Interleukin-2 (Aldesleukin, Proleukin, Recombinant Human Interleukin 2) ..... | 57 |
| 13.2 | Fludarabine .....                                                             | 58 |

|       |                                                                                                                     |    |
|-------|---------------------------------------------------------------------------------------------------------------------|----|
| 13.3  | Cyclophosphamide.....                                                                                               | 60 |
| 13.4  | Cell Preparation (E7 TCR Transduced PBL).....                                                                       | 61 |
| 13.5  | Mesna.....                                                                                                          | 61 |
| 13.6  | Filgrastim .....                                                                                                    | 62 |
| 13.7  | Trimethoprim and Sulfamethoxazole Double Strength (TMP/SMX DS) .....                                                | 63 |
| 13.8  | Aerosolized Pentamidine in Place of TMP/SMX DS .....                                                                | 63 |
| 13.9  | Herpes Virus Prophylaxis .....                                                                                      | 63 |
| 13.10 | Fungal Prophylaxis .....                                                                                            | 64 |
| 13.11 | Support Medications .....                                                                                           | 64 |
| 14    | REFERENCES .....                                                                                                    | 65 |
| 15    | APPENDIX 1: ADVERSE EVENTS OCCURRING IN $\geq 10\%$ OF PATIENTS TREATED WITH ALDESLEUKIN (N=525) <sup>1</sup> ..... | 67 |
| 16    | APPENDIX 2: EXPECTED IL-2 TOXICITIES AND THEIR MANAGEMENT .....                                                     | 69 |
| 17    | APPENDIX 3: INTERLEUKIN-2 TOXICITIES OBSERVED IN PATIENTS TREATED AT THE NIH CLINICAL CENTER.....                   | 72 |
| 18    | APPENDIX 4: CERTIFICATE OF ANALYSIS HPV-16 E7 TCR.....                                                              | 73 |
| 19    | APPENDIX 5: ECOG PERFORMANCE STATUS SCALE.....                                                                      | 75 |

## **1 INTRODUCTION**

### **1.1 STUDY OBJECTIVES**

#### 1.1.1 Phase I Primary Objective

- To determine a safe dose for E7 TCR cells plus aldesleukin for the treatment of metastatic HPV-16+ cancers.

#### 1.1.2 Phase II Primary Objective

- To determine the safety and efficacy of E7 TCR cells plus aldesleukin for the treatment of metastatic HPV-16+ cancers.

#### 1.1.3 Secondary Objective

- To assess overall survival.

#### 1.1.4 Exploratory Objective

- To conduct exploratory immunologic studies to understand and improve the administered treatment.

### **1.2 BACKGROUND AND RATIONALE**

Adoptive T cell therapy (ACT), the administration of autologous tumor-specific T cells, can mediate durable, complete regression of certain advanced-stage malignancies. (1) T cells for ACT can be directed against diverse tumors through T cell receptor (TCR) gene therapy in which peripheral blood T cells are transduced to express a TCR targeting a tumor antigen. This clinical protocol is for a treatment that targets HPV-16+ cancers with TCR gene therapy directed against HPV-16 E7. HPV-16 E7 is an ideal immunotherapeutic target that is constitutively expressed by and important for the survival of HPV-16+ cancers, and it is not expressed by healthy human tissues.(2) The rationale for this protocol is based on the application of the potent immunotherapy of ACT to the attractive therapeutic target of HPV-16 E7 in advanced-stage HPV-16+ cancers including cervical, oropharyngeal, anal, vulvar, vaginal, and penile malignancies. HPV-Associated Malignancies

In the United States, there are more than 11,000 deaths from cancer at HPV-associated sites annually (Table 1). (3-6) Metastatic or recurrent/refractory malignancies from these sites are incurable and difficult to palliate. Responses to chemotherapy are variable but generally short-lived. (7-9) In a Gynecologic Oncology Group randomized trial comparing four cisplatin-based doublets as first line therapy for cervical cancer the response rates were 22 to 29 percent and median PFS was 4 to 6 months and median overall survival (OS) was 10 to 13 months. (10) The addition of bevacizumab to combination chemotherapy has been reported to increase overall survival by 3.7 months, but the vast majority of patients die of their disease within 2 years. (11) Randomized trials of second line therapy are lacking, but response rates for single agents are generally reported to be less than 20 percent. (12) For oropharyngeal cancer, estimates of the chemotherapy responsiveness can be inferred from data on the oropharyngeal site in subset analyses from clinical trials for head and neck cancers. In a pivotal clinical trial that established platinum, 5-fluorouracil, plus cetuximab as first line therapy in head and neck cancer, patients with

oropharyngeal tumors experienced PFS of 4 to 6 months and OS of 8 to 11 months. (8) As with cervical cancer, randomized trials of second line therapy following platinum treatment failure are lacking. A phase II trial of cetuximab, a monoclonal antibody targeting epidermal growth factor receptor (EGFR) reported a response rate of 13 percent with time to progression of 70 days; cetuximab now represents the most promising second line therapy for this disease. (13) Thus, second line therapies for HPV-associated tumors have low response rates and poor response duration, and novel therapies are needed.

**Table 1: Estimated deaths from cancers at HPV-associated sites in the United States in 2014.**

Adapted from: American Cancer Society. Cancer Facts & Figures 2014. Atlanta: American Cancer Society; 2014.

| Site                                        | Deaths |
|---------------------------------------------|--------|
| Oral cavity & pharynx (not tongue or mouth) | 4,170  |
| Cervix                                      | 4,020  |
| Vulva                                       | 1030   |
| Female genital                              | 880    |
| Penis                                       | 320    |
| Anus                                        | 950    |
| Total                                       | 11,370 |

### 1.2.1 Tumor-Infiltrating T Cells Targeting HPV Oncoproteins for HPV+ Cancers

We are conducting a clinical trial of autologous HPV-targeted tumor-infiltrating T cells for metastatic HPV+ cancers in which objective tumor responses have been observed in cervical, oropharyngeal, and anal cancers. In this protocol T cell cultures are generated from fragments of resected metastatic tumors. T cell cultures are screened for reactivity against HPV E6 and E7. Reactive cultures are preferentially selected for further expansion and administration to the patient. We have reported the results of treatment of nine patients with metastatic cervical cancer including two patients with ongoing complete responses after a single infusion of T cells (14). In these patients the frequency of HPV-reactive T cells in the infused cells correlated positively with clinical response to treatment. Patients who received T cells with little or no reactivity against the HPV oncoproteins did not experience objective tumor regression. In addition, the frequency of peripheral blood T cells with HPV reactivity one month after treatment was positively associated with clinical response. While these results suggest a possible role for HPV-specific T cell in mediating tumor regression limited conclusions can be drawn. The administered T cells were not

purified for HPV reactivity; hence T cells with non-HPV reactivities were also given and may have played an important role in the clinical responses that were observed. Furthermore, the treatment is logistically complicated as it requires a surgical procedure, prolonged cell culture, and an HPV reactivity screening assay. Finally, not all tumor specimens yield T cells with HPV reactivity, and when this is the case it is not possible to confer reactivity. A more “off-the-shelf” cell therapy in which T cells are generated without an operation and have consistent reactivity against an HPV oncoprotein would be desirable.

### 1.2.2 Targeting of HPV oncoproteins with TCR Gene Therapy

The HPV-16 E6 and E7 oncoproteins are constitutively expressed by and important to the survival of HPV-16+ tumor cells, and absent from healthy human tissues. Approximately 65 percent of cervical, 70 percent of oropharyngeal, and 90 percent of anal cancers, as well as many vulvar, vaginal, and penile cancers, express these antigens, making them highly attractive therapeutic targets. (1, 2) T cells recognize epitopes of intracellular antigens that are presented by HLA molecules on the surface of tumor cells. CD8+ T cells, which specialize in direct recognition and killing of virally infected cells and tumor cells, require presentation of cognate peptide by a class I HLA molecule. HLA-A\*02:01 is the most common class I HLA allele in the United States population, expressed by 40 to 50 percent of Caucasians.

We are presently conducting a clinical trial of TCR gene engineered T cells targeting an HLA-A2 restricted epitope of HPV-16 E6 (E6 TCR). In this protocol, T cells from the patient’s peripheral blood are transduced with a retrovirus to express the E6 TCR. The transduced T cells are expanded *ex vivo* and administered back to the patient intravenously. Before cell administration the patient receives a lymphodepleting chemotherapy conditioning regimen to promote infused T cell engraftment. Following cell infusion the patient receives high-dose bolus aldesleukin, which is dosed to individual patient tolerance. We have, in a dose escalation trial, treated nine patients with this regimen. Dose limiting toxicity was not encountered (the maximum dose tested was in the range of  $1 \times 10^{11}$  to  $2 \times 10^{11}$  cells). Off target toxicity was not observed. Cytokine storm was not observed. Of the initial seven evaluable patients, one patient has experienced a partial tumor response that is ongoing after 6 months. (15)

### 1.2.3 E7 TCR discovery and characterization

E7<sub>11-19</sub> is a naturally processed epitope of HPV-16 E7 that binds to HLA-A\*02:01 and that has been isolated from the surface of HPV-16+ HLA-A\*02:01+ tumor cells. (16) We identified the nucleotide sequence of a TCR targeting E7<sub>11-19</sub> from the cervix-infiltrating T cells of a patient with cervical intraepithelial neoplasia who received a therapeutic cancer vaccine targeting HPV-16 E7. The nucleotide sequence was codon optimized for expression in human tissues and the TCR constant regions were swapped for their mouse counterparts, which in other receptors has improved TCR alpha/beta chain pairing. TCR expression was improved by reversing the order of the alpha and beta genes, and by making cysteine substitutions in the TCR constant regions and hydrophobic substitutions in the transmembrane region of the alpha chain constant region. (17, 18) The TCR sequence insert was cloned into the MSGV1 retroviral vector (Figure 1), which was chosen for this clinical trial based on its excellent safety record in treating greater than 200 patients.



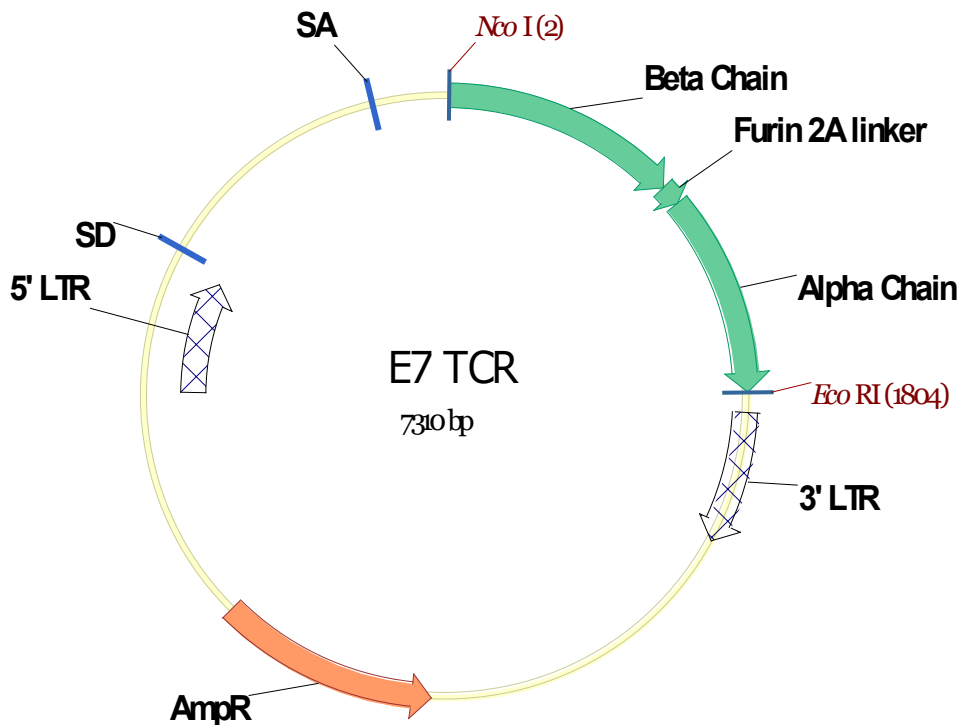

**Figure 1: E7 TCR vector map.** A TCR targeting E7<sub>11-19</sub> was isolated from the cervix-infiltrating lymphocytes of a patient with cervical intraepithelial neoplasia. The nucleotide sequence of the alpha and beta chains was determined, codon optimized for expression in human tissues, and the constant regions swapped for their mouse counterparts. A MSGV1 retroviral vector encoding this TCR was constructed. This retroviral vector consists of 7,310 base pairs and includes a 5'LTR from the murine stem cell virus (promoter), packaging signal including the splicing donor (SD) and splicing acceptor sites (SA). Alpha and beta chains of the E7 TCR are linked by a furin 2A peptide.

Peripheral blood T cells transduced to express the E7 TCR display high avidity for the E7<sub>11-19</sub> peptide (Figure 2) and CD8-independent HLA-A\*02:01/E7<sub>11-19</sub> tetramer binding (Figure 3). They specifically recognize a panel of HPV-16+ HLA-A\*02:01+ cervical and oropharyngeal cancer cell lines but not cell lines that lack HLA-A\*02:01 or HPV-16 (Figure 4). Thus, gene engineered T cells expressing the E7 TCR can specifically target HPV-16+ HLA-A\*02:01+ cancers. In contrast to TCRs that have had unexpected cross-reactivity against normal human proteins, this TCR was isolated directly from a human T cell.(2) Hence, it was subjected to thymic selection and is unlikely to possess avid reactivity against self-antigens. The complementarity determining regions of the TCR have not been modified; therefore, there is no chance that cross-reactivity has been artificially introduced. The target epitope is derived from a viral protein, and no more than 6 of its 9 amino acids are shared with any human protein (Table 2). There is no cross reactivity of this TCR with epitopes of human proteins that share six amino acids or five amino acids plus a conservative amino acid substitution (Figure 5). In addition, alanine scanning of E7<sub>11-19</sub> identified four important residues for recognition (Figure 6). Cross reactivity was not detected against epitopes of human proteins that shared these residues (Table 2).

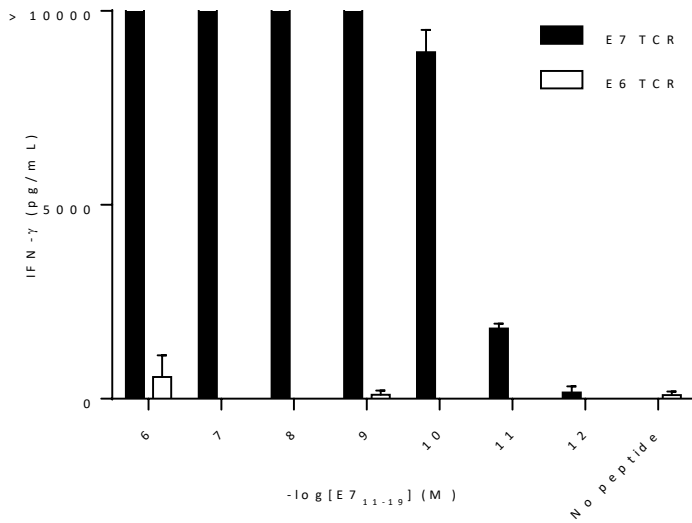

**Figure 2:** T cells transduced to express the E7 TCR demonstrated high avidity for the E7<sub>11-19</sub> peptide. T cells from PBMC were transduced to express the E7 TCR. Functional avidity was tested by coculture with T2 cells pulsed with titrated concentrations of E7<sub>11-19</sub> peptide.

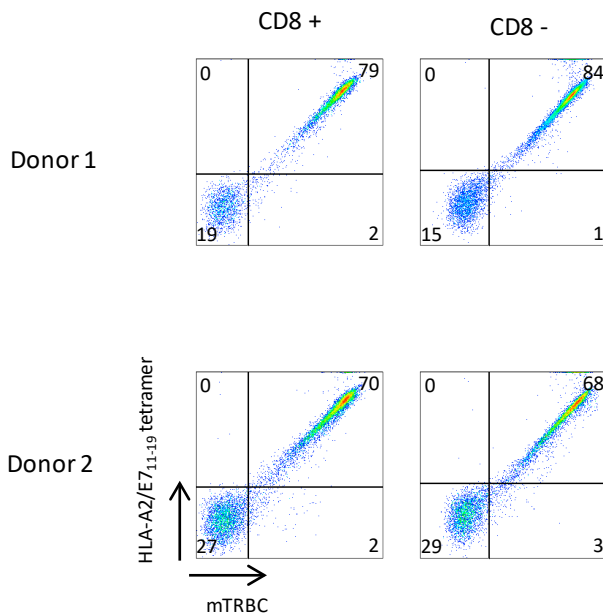

**Figure 3:** Peripheral blood T cells transduced to express the E7 TCR display CD8-independent HLA-A\*02:01/E7<sub>11-19</sub> tetramer binding. T cells from PBMC were transduced to express the E7 TCR. Dot plots shown are gated on PI- lymphocytes and either CD8+ or CD8- cells as indicated above the dot plots. The x-axis is mouse T cell receptor beta chain expression. The y-axis is tetramer binding.

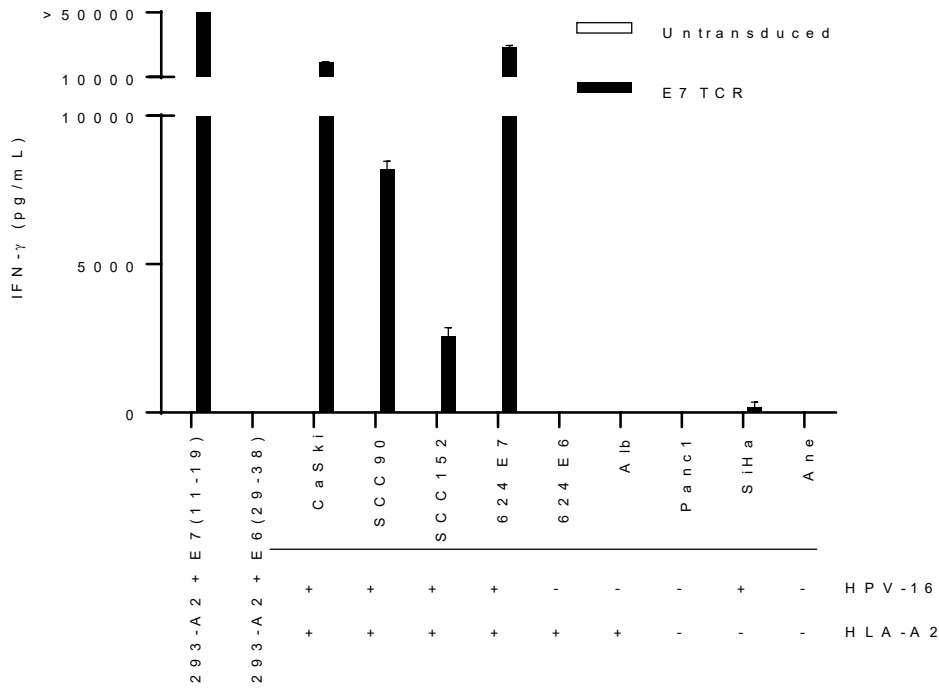

**Figure 4: T cells transduced to express the E7 TCR specifically recognized HPV-16+ HLA-A\*02:01+ tumor lines** T cells transduced with E7 TCR were cocultured with targets expressing HPV-16 and HLA-A2 or with negative controls. Target cell line expression of HPV-16 and HLA-A2 is indicated below each label on the x-axis.

A)

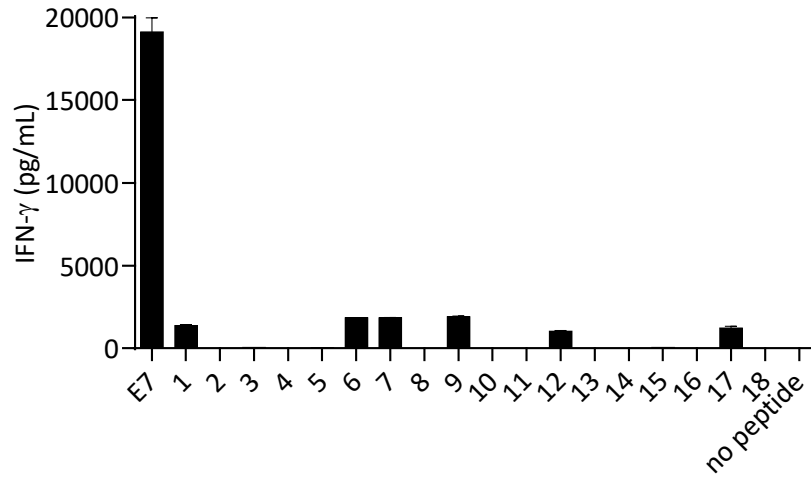

B)

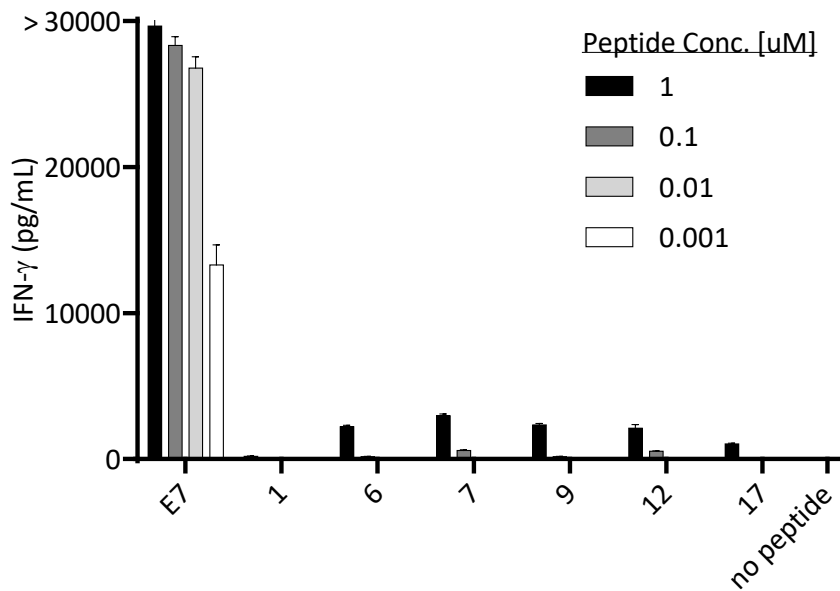

**Figure 5: E7 TCR transduced T cells did not show cross reactivity against human peptides.** E7 TCR transduced human T cells were tested for recognition of peptides identified by the BLAST search shown in [Table 2](#). Target cells were T2 cells loaded with either the E7 peptide (E7) as a positive control, peptides identified by number in [Table 2](#), or no peptide (A). Peptides which elicited a weak response by E7TCR were further tested for recognition at titrated concentrations (B).

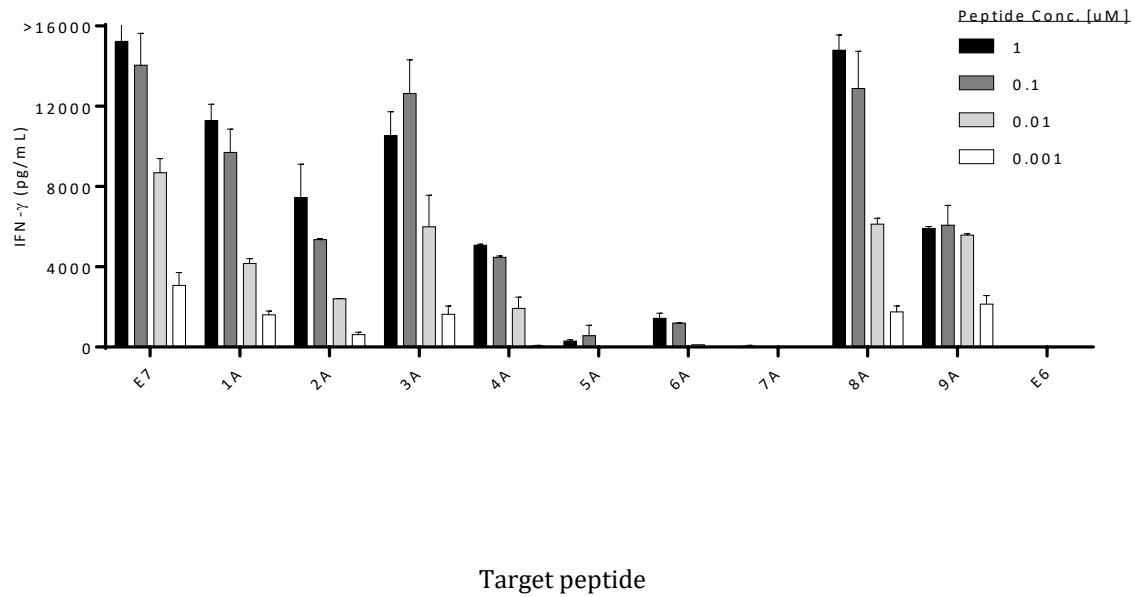

**Figure 6: Serial alanine substitutions to the E7<sub>11-19</sub> target peptide revealed positions 4-7 to be the most crucial for recognition by E7 TCR transduced T cells.** Human T cells were transduced to express the E7 TCR. The transduced cells were cocultured with T2 cells loaded with varying concentrations of E7<sub>11-19</sub> peptide (E7) or E7<sub>11-19</sub> with an alanine substitution at the position indicated by the x-axis labels. E6 peptide (E6) is an HLA-A2 restricted negative control peptide.

| Peptide No. | Protein                                                                | Sequence  |
|-------------|------------------------------------------------------------------------|-----------|
|             | E7 (11-19)                                                             | YMLDLQPET |
| 1*          | endophilin-B1 isoform 4 [Homo sapiens]                                 | YMLDLQkq1 |
| 2           | uncharacterized serine/threonine-protein kinase SBK3 [Homo sapiens]    | gLLDLdPET |
| 3           | zinc finger protein 236 [Homo sapiens]                                 | aMLDLEPQh |
| 4           | zinc finger protein GLIS1 [Homo sapiens]                               | sgLgLQPET |
| 5           | tensin-1 [Homo sapiens]                                                | lMLDLEPas |
| 6*          | clathrin coat assembly protein AP180 isoform c [Homo sapiens]          | dLLDLQPDf |
| 7*          | translational activator GCN1 [Homo sapiens]                            | mgLDLQPDl |
| 8           | phosphatidate phosphatase LPIN3 isoform X2 [Homo sapiens]              | agaDLQPDt |
| 9*          | GH3 domain-containing protein isoform 3 precursor [Homo sapiens]       | lgLNLPQEg |
| 10          | GH3 domain-containing protein isoform 1 precursor [Homo sapiens]       | eLNLPQEg  |
| 11          | protocadherin alpha-9 isoform 2 precursor [Homo sapiens]               | lsyELQPET |
| 12*         | integrin alpha-IIb preproprotein [Homo sapiens]                        | YiLDIQPQg |
| 13          | tripartite motif-containing protein 66 [Homo sapiens]                  | pvsDMQPET |
| 14          | neural cell adhesion molecule L1 isoform 3 precursor [Homo sapiens]    | tqwDLQPDt |
| 15          | receptor-type tyrosine-protein phosphatase S isoform X8 [Homo sapiens] | vitNLQPET |
| 16          | collagen alpha-1(XII) chain long isoform precursor [Homo sapiens]      | meiNLQPET |
| 17*         | sacsin isoform 2 [Homo sapiens]                                        | nrLDLQPDl |
| 18          | protein AHNAK2 [Homo sapiens]                                          | isgDLQPDt |

| Peptide No. | Protein                                                                                      | Sequence  |
|-------------|----------------------------------------------------------------------------------------------|-----------|
|             | E7 (11-19)                                                                                   | YMLDLQPET |
| 19          | Hermansky-Pudlak syndrome 1 protein isoform X8 [Homo sapiens]                                | pAvDLQPPA |
| 20          | 1-phosphatidylinositol 4,5-bisphosphate phosphodiesterase epsilon-1 isoform 2 [Homo sapiens] | eLiDLQPLI |
| 21          | dystrophin isoform X9 [Homo sapiens]                                                         | rLsDLQPQI |
| 22          | junctophilin-4 [Homo sapiens]                                                                | iAqDLQFmL |
| 23          | Werner syndrome ATP-dependent helicase [Homo sapiens]                                        | iLqDLQFfL |
| 24          | fibronectin isoform 6 preproprotein [Homo sapiens]                                           | tLsDLQPgV |

**Table 2** BLAST search for peptides with at least 6 (or least 5 identical + 1 conservative change) amino acids shared with E7<sub>11-19</sub>. Capital/Underlined = Amino Acid Identical to E7 epitope, Capital/Not Underlined = Conservative change. \*=Peptides that demonstrates weak cross-reactivity only at supraphysiological concentrations.

#### 1.2.4 Safety Considerations

The safety of infusion of large numbers of retrovirally modified tumor reactive T-cells has been demonstrated in clinical studies conducted at the NIH Clinical Center. (19, 20) Non-myeloablative chemotherapy conditioning and high-dose aldesleukin have well-characterized toxicity which is discussed in Section 11.1 of this study. (21) The chemotherapy used in this protocol has been administered to over 500 patients and all have reconstituted their hematopoietic system.

Patients at the NIH Clinical Center have been treated with up to  $1.77 \times 10^{11}$  gene engineered cells. The upper limit of the dose range for this trial was therefore set at  $1 \times 10^{11}$  transduced cells. The protocol is designed with a run in dose escalation but unexpected toxicities are unlikely because 1) the TCR targets a foreign viral protein that does not exist in the human genome so there is no chance of toxicity from targeting healthy tissue that unexpectedly expresses the target,

2) the TCR came from a human and therefore has been selected in thymus to not have autoreactivity, so autoimmunity is unlikely, 3) the TCR specificity has not been altered by affinity enhancement so there is no chance that cross reactivity against normal human proteins has been introduced, and 4) testing against human peptides with similarity to the target epitope and with human peptides identified by alanine scanning revealed no cross reactivity (2).

Other protocols at the NIH Clinical Center have administered over  $1 \times 10^{11}$  tumor infiltrating lymphocytes (TIL) with widely heterogeneous reactivity including CD4, CD8, and NK cells without infusional toxicities. Experience at the NIH Clinical Center treating more than 200 patients with advanced cancers with genetically engineered T cells indicates that these cells do not have a significant risk of malignant transformation in this setting. While the risk of insertional mutagenesis is a known possibility using retroviral vectors, this has only been observed in the setting of infants treated for XSCID, WAS and X-CGD using retroviral vector-mediated gene transfer into CD34+ bone marrow cells. In the case of retroviral vector-mediated gene transfer into mature T cells there has been no evidence of long-term toxicities since the first NCI sponsored gene transfer study in 1989. Although continued follow-up of all gene therapy patients will be required, data suggest that administration of retrovirally transduced mature T cells is a safe procedure. While the risk of insertional mutagenesis is extremely low, the proposed protocol follows all current FDA guidelines regarding testing and follow up of patients receiving gene transduced cells.

Update with amendment H: The initial protocol included combination of E7 T cells with pembrolizumab in additional dose levels (dose level 4 and dose level 5). Clinical responses to E7 T cells without pembrolizumab were observed at the lower dose levels. The decision was made to remove dose level 4 and dose level 5 from the protocol due to the unknown safety of combination therapy and the apparent clinical activity of E7 T cells without pembrolizumab.

Because a safe dose of cells was determined in the phase I part of the trial, and some patients experienced a partial response, and each treatment is a single dose of E7 T cells, the protocol was amended to permit retreatment of patients with a partial response.

Update with amendment I: One dose-limiting toxicity occurred in the first 11 patients on this protocol. The patient had impaired lung function from rapidly progressing cancer in the lungs and experienced severe lung, cardiovascular, and kidney toxicity that required temporary mechanical ventilation, pressors, and hemodialysis, that resulted in soft tissue injury to the distal lower extremities. To increase safety, patients will be required to have a resting pulse oxygen measurement on room air as outlined in sections 2.1.2.9, 2.4.2 and 2.4.3. The maximum tolerated dose found in the phase I portion of the study was  $1 \times 10^{11}$  E7 TCR T cells.

Update with amendment J: One patient treated on the phase II portion of the study experienced delirium and hypotension after E7 TCR T Cells and one dose of aldesleukin that required mechanical ventilation, vasopressors and hemodialysis. The patient also developed a HLH-like disorder characterized by fevers, prolonged low blood counts, and elevated ferritin and soluble CD25 that resolved following treatment with steroids. The patient also had delayed recovery of blood counts that was contributed to prior chemotherapy, prior pelvic radiation and poor nutrition. To further assess safety, patients will now also have a neurological assessment with neurological exam performed at baseline and daily during treatment with aldesleukin as outlined in sections 2.2.2, 3.3 and 0.

## **2 ELIGIBILITY ASSESSMENT AND ENROLLMENT**

### **2.1 ELIGIBILITY CRITERIA**

#### 2.1.1 Inclusion Criteria

- 2.1.1.1 Measurable (per criteria in section [6.3](#)) metastatic or refractory/recurrent HPV-16+ cancer (determined by in situ hybridization (ISH) or a polymerase chain reaction (PCR)-based test).
- 2.1.1.2 Patients must be HLA-A\*02 by low resolution typing, and HLA-A\*02:01 by one of the high resolution type results.
- 2.1.1.3 All patients must have received prior first line standard therapy or declined standard therapy.
- 2.1.1.4 Patients with three or fewer brain metastases that have been treated with surgery or stereotactic radiosurgery are eligible. Lesions that have been treated with stereotactic radiosurgery must be clinically stable for one month before protocol treatment. Patients with surgically resected brain metastases are eligible.
- 2.1.1.5 Greater than or equal to 18 years of age
- 2.1.1.6 Able to understand and sign the Informed Consent Document.
- 2.1.1.7 Clinical performance status of ECOG 0 or 1, as shown in [Appendix 5](#).
- 2.1.1.8 Patients of both genders must be willing to practice birth control from the time of enrollment on this study up to four months after treatment. Patients must be willing to undergo testing for HPV-16 prior to becoming pregnant after this period.
- 2.1.1.9 Women of childbearing potential must have a negative pregnancy test because of the potentially dangerous effects of the treatment on the fetus. Women of childbearing potential are defined as all women except women who are postmenopausal or who have had a hysterectomy. Postmenopausal will be defined as women over the age of 55 who have not had a menstrual period in at least one year. Because there is a potential risk for adverse events in nursing infants secondary to treatment of the mother with E7 TCR transduced PBL, breastfeeding should be discontinued if the mother is treated with E7 TCR transduced PBL. These potential risks may also apply to other agents used in this study.
- 2.1.1.10 Serology:
  - Seronegative for HIV antibody. (The experimental treatment being evaluated in this protocol depends on an intact immune system. Patients who are HIV seropositive can have decreased immune-competence and thus are less responsive to the experimental treatment and more susceptible to its toxicities.)
  - Seronegative for hepatitis B antigen, and seronegative for hepatitis C antibody. If hepatitis C antibody test is positive, then the patient must be tested for the presence of antigen by RT-PCR and be HCV RNA negative.



- a. Hematology:
  - Absolute neutrophil count greater than  $1000/\text{mm}^3$  without the support of filgrastim.
  - $\text{WBC} \geq 3000/\text{mm}^3$
  - Platelet count  $\geq 100,000/\text{mm}^3$
  - Hemoglobin  $> 8.0 \text{ g/dL}$
- b. Chemistry:
  - Serum ALT/AST  $\leq 2.5$  times the upper limit of normal
  - Calculated creatinine clearance (CCr)  $\geq 50 \text{ mL/min}/1.73^2$  using the Cockcroft-Gault equation
  - Total bilirubin  $\leq 1.5 \text{ mg/dL}$ , except in patients with Gilbert's Syndrome who must have a total bilirubin less than  $3.0 \text{ mg/dL}$
- c. More than four weeks must have elapsed since any prior systemic therapy at the time the patient receives the E7 TCR cells.

**Note:** Patients may have undergone minor surgical procedures within the past three weeks, as long as all toxicities have recovered to Grade 1 or less or as specified in the eligibility criteria in Section **2.1.1**.

## 2.1.2 Exclusion Criteria

- 2.1.2.1 Active systemic infections (for e.g.: requiring anti-infective treatment), coagulation disorders or other active major medical illnesses of the cardiovascular, respiratory or immune system, as evidenced by a positive stress thallium or comparable test, myocardial infarction, cardiac arrhythmias, severe obstructive or restrictive pulmonary disease. Patients with abnormal pulmonary function tests but stable obstructive or restrictive pulmonary disease may be eligible.
- 2.1.2.2 Any form of primary immunodeficiency (such as Severe Combined Immunodeficiency Disease).
- 2.1.2.3 Concurrent opportunistic infections (The experimental treatment being evaluated in this protocol depends on an intact immune system. Patients who have decreased immune competence may be less responsive to the experimental treatment and more susceptible to its toxicities).
- 2.1.2.4 Patients with autoimmune diseases such as Crohn's disease, ulcerative colitis, rheumatoid arthritis, autoimmune hepatitis or pancreatitis, and systemic lupus erythematosus. Hypothyroidism, vitiligo and other minor autoimmune disorders are not exclusionary.
- 2.1.2.5 Concurrent systemic steroid therapy.
- 2.1.2.6 History of severe immediate hypersensitivity reaction to cyclophosphamide, fludarabine or aldesleukin.
- 2.1.2.7 Patients with a history of coronary revascularization or ischemic symptoms unless patient has a normal cardiac stress test.

2.1.2.8 Documented LVEF of less than or equal to 45% tested. The following patients will undergo cardiac evaluations

- a. Clinically significant atrial and/or ventricular arrhythmias including but not limited to: atrial fibrillation, ventricular tachycardia, second or third degree heart block or
- b. Age  $\geq$  50 years old

2.1.2.9 Subjects with baseline screening pulse oxygen level of  $<$  95% on room air will not be eligible. If the underlying cause of hypoxia improves, then they may be reevaluated.

### 2.1.3 Recruitment Strategies

Patients for this protocol will be recruited via standard CCR mechanisms including posting to NIH websites (i.e., clinicaltrials.gov) and social media platforms, physician and self-referrals as well as various advertising venues. All advertisements, letters and other recruitment efforts will be submitted to the IRB for approval prior to their implementation.

## 2.2 SCREENING EVALUATION

### 2.2.1 Screening activities performed prior to obtaining informed consent

Minimal risk activities that may be performed before the subject has signed a consent include the following:

- Email, written, in person or telephone communications with prospective subjects
- Review of existing medical records to include H&P, laboratory studies, etc.
- Review of existing MRI, x-ray, or CT images
- Review of existing photographs or videos
- Review of existing pathology specimens/reports from a specimen obtained for diagnostic purposes

A waiver of consent for these activities has been requested in section [12.6.1](#).

### 2.2.2 Screening activities performed after a consent for screening has been signed

The following activities will be performed only after the subject has signed the consent for this study for screening. Assessments performed at outside facilities or on another NIH protocol within the timeframes below may also be used to determine eligibility once a patient has signed the consent.

#### 2.2.2.1 Any time prior to starting the chemotherapy regimen:

- a. HLA typing
- b. HPV genotype testing of tumor. Archival tissue may be used or a new biopsy may be obtained.
- c. Venous assessment (as per apheresis clinic policy)

#### 2.2.2.2 Within 4 weeks prior to starting the chemotherapy regimen:

- a. Complete history and physical examination, including weight, and vital signs noting in detail the exact size and location of any lesions that exist. (Note: Patient history may be obtained within 8 weeks.)
- b. EKG

- c. Chest x-ray
- d. Pulmonary Function Testing for patients with a prolonged history of cigarette smoking (20 pack/year of smoking within the past 2 years) or symptoms of respiratory dysfunction. (Note: If performed prior to receiving treatment, this does not need to be repeated unless clinically indicated. Test results from outside NIH may be accepted per investigator discretion).
- e. If available, previous CT of the chest, abdomen and pelvis, and brain MRI or PET to evaluate the status of disease. Additional scans and x-rays may be performed if required to determine patient eligibility or if clinically indicated based on patients' signs and symptoms.
- f. Cardiac evaluation for patients who are greater than or equal to age 50, or who have a history of ischemic heart disease, chest pain, or clinically significant atrial and/or ventricular arrhythmias including but not limited to: atrial fibrillation, ventricular tachycardia, heart block. Patients with a LVEF of less than or equal to 45% will not be eligible. Patients under the age of 50 who present with cardiac risk factors may undergo cardiac evaluation as noted above (e.g., diabetes, hypertension, obesity.) Test results from outside NIH may be accepted per investigator discretion. Tests must be performed within 3 months of enrollment and can be performed either at the NIH or an outside institution.
- g. HIV antibody titer and HbsAG determination, anti-HCV. (Note: may be performed within 3 months of chemotherapy start date but must be within one month before initial apheresis for generation of a cell product).
- h. Anti CMV antibody titer, HSV serology, and EBV panel. (Note: patients who are known to be positive for any of the above do not need to be retested; may be performed within 3 months of chemotherapy start date).

2.2.2.3 Within 14 days prior to starting the chemotherapy regimen:

- a. Blood tests:
  - Chemistries: (Sodium (Na), Potassium (K), Chloride (Cl), Total CO<sub>2</sub> (Bicarbonate), Creatinine, Glucose, Urea nitrogen (BUN), Albumin, Calcium total, Magnesium total (Mg), Inorganic Phosphorus, Alkaline Phosphatase, ALT/GPT, AST/GOT, Total Bilirubin, Direct Bilirubin, LD, Total Protein, Total CK, Uric Acid).
  - Thyroid Panel
  - CBC with differential and TBNK PT/PTT
- b. Urinalysis and culture if indicated

2.2.2.4 Within 7 days prior to starting the chemotherapy regimen:

- a. Beta-HCG pregnancy test (serum or urine) on all women of child-bearing potential
- b. ECOG performance status of 0 or 1

## **2.3 REGISTRATION PROCEDURES**

Registration will be a two-part process as patients are screened on this protocol using a separate screening consent. Authorized staff must register an eligible candidate with NCI Central

Registration Office (CRO) within 24 hours of signing consent. To initially register a subject after the participant has signed the consent, complete the top portion the registration Eligibility Checklist from the website (<http://home.ccr.cancer.gov/intra/eligibility/welcome.htm>) indicating that the patient is being registered for screening and send via encrypted email to: NCI Central Registration Office [ncicentralregistration-l@mail.nih.gov](mailto:ncicentralregistration-l@mail.nih.gov). Once eligibility is confirmed after completion of screening studies and the patient has signed the protocol treatment consent, complete the remainder of the form which is the eligibility checklist, indicating that the patient is being registered for treatment and email the completed registration checklist to the CRO at NCI Central Registration Office [ncicentralregistration-l@mail.nih.gov](mailto:ncicentralregistration-l@mail.nih.gov). After confirmation of eligibility at Central Registration Office, CRO staff will call pharmacy to advise them of the acceptance of the patient on the protocol prior to the release of any investigational agents. Verification of Registration will be forwarded electronically via e-mail to the research team. A recorder is available during non-working hours.

Subjects that do not meet screening criteria should be removed from the study following the procedure in section **3.7.3**

### 2.3.1 Treatment assignment and randomization/stratification procedures for Registration Purposes Only

#### Cohorts

| Number | Name                                   | Description                                                                                                                                                                                           |
|--------|----------------------------------------|-------------------------------------------------------------------------------------------------------------------------------------------------------------------------------------------------------|
| 1      | <i>Phase I: Dose Escalation Cohort</i> | <i>Up to 18 evaluable patients with HPV-16 positive cancer to determine MTD of E7 cells + aldesleukin</i>                                                                                             |
| 2      | <i>Phase II Cohort</i>                 | <i>Patients with HPV-16 positive cancer enrolled after the RP2D of <math>1 \times 10^{11}</math> E7 cells + aldesleukin has been determined (total enrollment including Phase I not to exceed 40)</i> |

#### Arms

| Number | Name                          | Description                                                                                                                               |
|--------|-------------------------------|-------------------------------------------------------------------------------------------------------------------------------------------|
| 1      | <i>Dose level 1 through 3</i> | <i>Non-myeloablative, lymphocyte depleting preparative regimen, followed by E7 TCR Cells at escalating doses, followed by aldesleukin</i> |
| 2      | <i>Phase II arm</i>           | <i><math>1 \times 10^{11}</math> E7 Cells that was determined in Phase I + aldesleukin</i>                                                |

#### Stratification

Not applicable.

#### Randomization and Arm assignment

This is not a randomized trial. Patients in Cohort 1 will be directly assigned to Arm 1, and patients in Cohort 2 will be directly assigned to Arm 2. Please contact Erin Ferraro at 240-760-6163 with questions.

## **2.4 BASELINE EVALUATIONS**

The following are baseline evaluations that are not included in the screening process. Some of the screening evaluations may be used as baseline.

### **2.4.1 Within 4 weeks prior to starting the chemotherapy regimen:**

- a. Patients with lesions that can be biopsied under sedation and/or local anesthesia (skin lesions, visceral lesions approachable by CT, USG or MRI guided core biopsy) and who are willing to have biopsies performed, will have a baseline pre-treatment biopsy followed by two additional biopsies, one following treatment (6 weeks post treatment preferred) and the second at the time of progression. Refer to Section **5.1.3** for guidelines for handling specimens.
- b. CT of the chest, abdomen and pelvis.
- c. PET or brain MRI may be performed if clinically indicated to evaluate the status of disease.
- d. Evaluation with colonoscopy, esophagogastroduodenoscopy or other form of endoscopy may be performed to evaluate for the presence of disease in the GI tract or if clinically indicated.
- e. Neurological assessment with a neurological exam.

### **2.4.2 Within 24 hours before starting intravenous fluid hydration for chemotherapy**

- a. Pulse oxygen level on room air will be assessed at a timepoint within 24 hours before starting intravenous fluid hydration for chemotherapy. If this value is  $< 95\%$  hydration then chemotherapy will be held until it is  $\geq 95\%$ , or it is determined that the patient's hypoxia is irreversible, in which case the patient will be considered ineligible.

### **2.4.3 Within 24 hours before infusion of E7 T cells**

- a. Pulse oxygen level on room air will be assessed at a timepoint within 24 hours before infusion of E7 T cells. If this value is  $< 95\%$  T cell infusion will be held until it is  $\geq 95\%$ . Cell infusion may be delayed for up to 48 hours.

## **3 STUDY IMPLEMENTATION**

### **3.1 STUDY DESIGN**

This is a phase I/II clinical trial that will test the safety and efficacy of E7 TCR cells.

A small number of subjects may be eligible for re-enrollment, and would be required to meet all eligibility criteria at the time of re-enrollment. Patients will be assigned a new sequential study number for the re-enrollment study period. Any cryopreserved cells produced from a patient who was removed from the study can be used to treat that patient after re-enrollment. We do not anticipate changes in the risk profile for the initial versus re-enrollment

**Schema:**

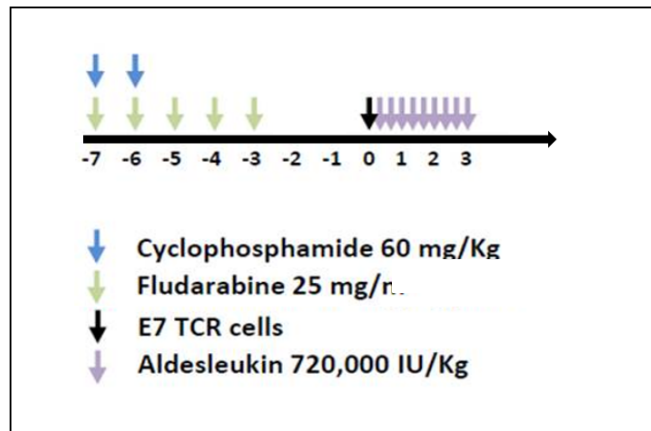

\*Details regarding the number of patients in each dose level group are provided in section [3.1.5](#).

### 3.1.1 Leukapheresis

The patient will undergo a 10-15 liter leukapheresis (generally, 12 liters will be processed to target a yield of  $6-10 \times 10^9$  lymphocytes) in the Department of Transfusion Medicine (DTM) Dowling Apheresis Clinic according to DTM standard operating procedures. This procedure may occur on this protocol, or protocol 16C0061, if the patient chooses to co-enroll on that protocol. The procedure requires dual venous access, and takes approximately 3-4 hours to complete. A central line will be placed if peripheral venous access is not sufficient. The leukapheresis collection will be obtained at least 21 days prior to the cell infusion. Leukapheresis material that is not required for clinical use will be retained and cryopreserved in 10 vials at  $100 \times 10^6$  cells per vial with remaining cells stored at  $300 \times 10^6$  cells per vial for research and banked on protocol 16-C-0061 (ETIB Tissue Procurement Protocol).

### 3.1.2 E7 TCR T cell preparation

After cells are obtained by apheresis (either on this protocol or protocol 16C0061 if the patient has co-enrolled on that protocol), further cell processing to generate E7 TCR cells will occur in the DTM according to standard operating procedures and the E7 TCR investigational new drug application. If apheresis has been performed on protocol 16C0061 and the patient consents and is eligible for treatment on this study, cells will be transferred to this study and all cell preparation will occur as part of this protocol. Any unused cells from this protocol can be transferred to 16-C-0061 and banked for research if a patient is co-enrolled. E7 TCR cells can be produced in approximately 21 to 27 days. Cell products may be cryopreserved during production to accommodate patient treatment schedules. Either freshly-collected cells or cryopreserved cells can be used to initiate the cell-preparation process. Peripheral blood mononuclear cells (PBMC) will be isolated. Sufficient cells for three complete cell productions ( $2-3$  vials at  $3-4.5 \times 10^9$  cells/vial) will be retained in the DTM; the remaining cells will first be frozen in 10 vials at  $100 \times 10^6$  cells per vial with excess frozen at  $300 \times 10^6$  cells/vial. Cells will be frozen in the DTM and then transferred to the ETIB Preclinical Development and Clinical Monitoring Facility (PDCMF) the following day. The contact in the ETIB PDCMF is Jeremy Rose (301-594-5339).

Before infusion, the percentage of T cells expressing the E7 TCR will be determined by flow cytometry. In addition to flow cytometry, further testing of the cells will take place prior to infusion to evaluate for microbial contamination, replication-competent retroviruses, and viability. Details of this testing can be found in the appropriate DTM SOPs. When a patient is no longer eligible for retreatment on this protocol due to meeting any of the off-study criteria listed in Section 3.7.2, any remaining cryopreserved pretreatment PBMC collected on this protocol will be transferred from the Department of Transfusion Medicine to the Principal Investigator of this protocol for storage in the ETIB PDCMF and possible use in research and banked according to protocol 16-C-0061 (ETIB Tissue Procurement Protocol).

### 3.1.3 Treatment Phase

PBMC will be obtained by leukapheresis (approximately  $2 \times 10^9$  to  $1 \times 10^{10}$  cells are obtained). PBMC will be cultured in the presence of anti-CD3 (OKT3) and aldesleukin in order to stimulate T-cell growth. Transduction is initiated by exposure of approximately  $10 \times 10^6$  to  $500 \times 10^6$  cells to supernatant containing the E7 TCR retroviral vector. These transduced cells will be expanded and tested for their anti-tumor activity. Successful TCR gene transfer will be determined by FACS analysis for the TCR protein. Successful TCR gene transfer for each transduced peripheral blood lymphocyte (PBL) population will be defined as greater than 10% TCR positive cells. A central line catheter may be used for the intravenous infusion of E7 TCR T cells.

Prior to receiving the engineered PBL cells, patients will receive a non-myeloablative but lymphocyte depleting preparative regimen consisting of cyclophosphamide and fludarabine, on days -7 to -3 before the intravenous infusion of *in vitro* tumor reactive TCR gene-transduced PBL plus IV high dose aldesleukin, as indicated in Section 3.2.3. Patients will receive one course of treatment. The start date of the course will be the start date of the chemotherapy; the end date will be the day of the first post-treatment evaluation and the first safety and response assessment at the first follow-up visit.

### 3.1.4 Dose Limiting Toxicities (DLTs)

All Grade 3 and greater toxicities occurring within 30 days of the cell infusion with the exception of:

- Cytokine Release Syndrome (CRS) that resolves  $\leq$  grade 2 within 14 days of the last dose of aldesleukin
- Autoimmune toxicity that resolves to  $\leq$  grade 2 within 14 days for starting symptom treatment (e.g. steroids)
- Cardiac, gastrointestinal, dermatological, hepatic, pulmonary, renal, hematologic, neurologic toxicity, or toxicity in [Appendix 2](#) attributable to aldesleukin that resolves to  $\leq$  grade 2 within 14 days of the last dose of aldesleukin
- Transient grade 3 hypoxia associated with cell infusion that corrects to  $\leq$  grade 2 with supplemental oxygen and/or that resolves to  $\leq$  grade 2 within 24 hours or before starting aldesleukin.
- Hemorrhage due to underlying cancer or prior radiotherapy
- Infection that is controlled within 7 days of onset
- Hematological toxicities because they are expected from the conditioning regimen and their duration is unpredictable



- If a DLT is clearly due to progressive disease the subject will be replaced and the DLT will not be included.

**Note:** Any adverse event that leads to a discontinuation of T-cell infusion will be considered a DLT.

### 3.1.5 Dose Escalation

Phase I of the protocol will follow a 3+3 phase 1 dose escalation design. At each dose level, three patients will be treated initially\*. Should none of the first 3 patients treated on a dose level experience a DLT enrollment can start on the next higher dose level. Should 1 of 3 patients experience a dose limiting toxicity on a particular dose level, three more patients would be treated at that dose level to confirm that no greater than 1/6 patients have a DLT prior to proceeding to the next higher level. If 1/6 patients have a DLT at a particular dose level, accrual can proceed to the next higher dose level. If a level with 2 or more DLTs in 3-6 patients has been identified, 3 additional patients will be accrued at the next-lowest dose for a total of 6, in order to further characterize the safety of the maximum tolerated dose. The maximum tolerated dose is the dose at which a maximum of 1 of 6 patients has a DLT. If 2 DLTs occur on dose level 1, study will be stopped.

**With amendment G**, an additional three patients have been added to dose level three to allow for collection of additional data on E7 TCR T cells without pembrolizumab (no DLT has been encountered).

**With amendment H**, a total of 40 patients will be treated in Phase II, including the 3 additional patients added via amendment G, to dose level 3. The maximum tolerated dose was not reached in the Phase I portion, so the maximum administered safe dose will be designated as the recommended Phase II dose (RP2D). These patients will also be evaluated for safety and efficacy (see Section 8).

There will be a 12 day delay in treatment between the patients within each dose level. Therefore, after a patient in a dose level starts chemotherapy, the next patient in the same dose level will not start chemotherapy until at least 12 days later to allow more time for the analysis of adverse events. There will also be a 4 week delay between each dose level in order to further increase patient safety.

The total number of anti-HPV-16 E7 engineered PBL cells transferred for each dose level will be in the ranges of:

- **Dose level 1**      1 x 10<sup>9</sup> transduced E7 TCR cells
- **Dose level 2**      1 x 10<sup>10</sup> transduced E7 TCR cells
- **Dose level 3**      1 x 10<sup>11</sup> transduced E7 TCR cells

The cell dose administered will be in a range of +/- 30% of the target dose above. The number of transduced cells will be quantified by multiplying the frequency of cells expressing the mouse TCR constant region (determined by flow cytometry) by the number of cells produced. If fewer than the target number of cells are generated the patient will still be treated but toxicity data from the patient will not be used in determining the MTD.



**With amendment I**, a total of 40 patients will be treated in Phase II, including the 3 additional patients added via amendment G, to dose level 3. The maximum tolerated dose was reached in the Phase I portion. The dose that will be used in the Phase II portion of the study is  $1 \times 10^{11}$  transduced E7 TCR cells (Dose level 3). These patients will also be evaluated for safety and efficacy (see Section 8).

### 3.1.6 Safety Protocol Stopping Rules

The study will be halted (immediately stop accrual and treatment) if any of the following safety conditions are met during phase I portion and we will promptly investigate and submit an amendment to the IRB and FDA if necessary:

1. If one or more deaths (other than death related to progressive disease) occurs within 30 days of treatment regimen.
2. If two or more patients develop a Grade 3 or greater toxicity at any point in the study not attributable to the chemotherapy preparative regimen or aldesleukin (or circumstances unrelated to the study) that does not resolve to Grade 2 within 10 days.
3. If 2 DLTs occur on dose level 1.

## 3.2 DRUG ADMINISTRATION

Treatment schedule will be according to the following schedule (See Schedules 3.2.3). (Times are offered as examples and may be changed as long as a similar time relationship between administrations of the drugs is maintained. Study medication start times for drugs given once daily may be within 2 hours of the scheduled time [once it is established at the first administration]. All other medications may be given +/- one hour of the scheduled time; the length of administration may be +/- 15 minutes. Administration of diuretics, electrolyte monitoring and replacement, and hydration should all be performed as clinically indicated – the times noted below are offered only as examples. Chemotherapy infusions maybe slowed or delayed as medically indicated.)

### 3.2.1 Preparative Regimen

The following will comprise a course of therapy for Day -7 through Day -3:

#### 3.2.2 Day -7 and -6

11 am: Hydrate. Begin hydration with 0.9% sodium chloride injection with or without 10 meq/L of potassium chloride at 1.5 ml/kg/hour (recommend starting at least 6 hours pre-cyclophosphamide and continue hydration until 24 hours after last cyclophosphamide infusion). Furosemide 10-20 mg IV will be given once daily on cyclophosphamide treatment days to promote diuresis. At any time during the preparative regimen, if the urine output <1.5 ml/kg/hour or if body weight >2 kg over pre-cyclophosphamide value, additional doses of furosemide 10-20 mg IV may be administered. The hydration rate will be capped at 100 mL/hr. The rate of hydration and total time of hydration may be reduced or increased based on urine output and other clinical considerations per the primary investigator.

4 pm: Ondansetron (0.15 mg/kg/dose [rounded to the nearest even mg dose between 8 mg and 16 mg based on patient weight] IV q 8 hours X 3 days), Olanzapine (10 mg PO once daily for 5 days) and Aprepitant (125 mg PO on day 1, 80 mg PO daily on days -7, -6

and -5) will be utilized for prophylaxis for chemotherapy induced nausea and vomiting. Modifications to the antiemetic regimen may be made per PI discretion but corticosteroids should be avoided.

5 pm: Cyclophosphamide 60 mg/kg/day X 2 days IV in 250 ml D5W with mesna 15 mg/kg/day over 1 hour X 2 days. If the patient is obese (BMI > 35) drug dosage will be calculated using practical weight as described in **Table 3**. A dose of 30 mg/kg/day may be substituted based on clinical judgment. **Note:** All mesna doses will also be reduced by 50% if cyclophosphamide is given at 30 mg/kg/day.

Begin mesna infusion at 3 mg/kg/hour intravenously diluted in a suitable diluent (see section **11.5**) over 23 hours after each cyclophosphamide dose. If the patient is obese (BMI > 35) drug dosage will be calculated using practical weight as described in **Table 3**.

#### Day -7 to Day-3

Fludarabine 25 mg/m<sup>2</sup>/day IVPB daily over 15-30 minutes for 5 days.

If the patient is obese (BMI > 35) drug dosage will be calculated using practical weight as described in **Table 3**. (*The fludarabine will be started approximately 1-2 hours after the cyclophosphamide and mesna on Days -7 and -6*)

#### 3.2.3 Cell Infusion and other treatment Administration

The E7 TCR cells will be delivered to the patient care unit by an authorized staff member. Prior to infusion, the cell product identity label is double-checked by two authorized staff (MD or RN), an identification of the product and documentation of administration are entered in the patient's chart, as is done for blood banking protocols.

#### Day 0 (two to four days after the last dose of fludarabine):

- E7 TCR T cells will be administered intravenously over 20 to 30 minutes via non-filtered tubing, gently agitating the bag during infusion to prevent cell clumping.
- Aldesleukin as described in section **3.3** below.

#### Day 0-4 (Day 0 is the day of cell infusion):

- Fluconazole: can be used at the discretion of the treating clinician
- Valacyclovir po or Acyclovir IV: will be administered until CD4 counts > 200/mm<sup>3</sup> X 2

#### Day 1-4 (Day 0 is the day of cell infusion):

- Aldesleukin as described in section **3.3** below.

TMP/SMX may be administered at 160mg/800mg every other day from day -7 to day 3

**Dose 1-3 Schedule**

| Day                                                           | -7 | -6 | -5 | -4 | -3 | -2 | -1 | 0 | 1 | 2 | 3 | 4 |
|---------------------------------------------------------------|----|----|----|----|----|----|----|---|---|---|---|---|
| <b>Therapy</b>                                                |    |    |    |    |    |    |    |   |   |   |   |   |
| Cyclophosphamide<br>60 mg/kg IV once<br>daily x 2 days        | X  | X  |    |    |    |    |    |   |   |   |   |   |
| Ondansetron 0.15<br>mg/kg IV every 8<br>hours x 3 days        | X  | X  | X  |    |    |    |    |   |   |   |   |   |
| Olanzapine 10mg PO<br>once daily x 5 days                     | X  | X  | X  | X  | X  |    |    |   |   |   |   |   |
| Aprepitant 125 mg<br>PO X1, 80 mg PO<br>daily X2              | X  | X  | X  |    |    |    |    |   |   |   |   |   |
| Mesna 3 mg/kg/hour                                            | X  | X  |    |    |    |    |    |   |   |   |   |   |
| Fludarabine<br>25 mg/m <sup>2</sup> IV once<br>daily x 5 days | X  | X  | X  | X  | X  |    |    |   |   |   |   |   |
| E7 TCR cells                                                  |    |    |    |    |    |    |    | X |   |   |   |   |
| Aldesleukin                                                   |    |    |    |    |    |    |    | X | X | X | X | X |
| Valacyclovir PO or<br>Acyclovir IV                            |    |    |    |    |    |    |    | X | X | X | X | X |

**3.3 ALDESLEUKIN: INTRAVENOUS ADMINISTRATION**

Aldesleukin will be administered at a dose of 720,000 IU/kg (based on total body weight) as an intravenous bolus over a 15 minute period beginning within 24 hours of cell infusion and continuing for up to four days (maximum 12 doses). The start of aldesleukin treatment may be delayed up to 3 days after cell infusion if medically necessary. Doses will be preferentially administered every eight hours; however, up to 24 hours may elapse between doses depending on patient tolerance. Aldesleukin dosing will be stopped if toxicities are not sufficiently recovered with supportive measures within 24 hours of the last dose of aldesleukin. Doses will be delayed or stopped if patients reach Grade 3 or 4 toxicity due to aldesleukin except for the reversible Grade 3 toxicities common to aldesleukin such as diarrhea, nausea, vomiting, hypotension, skin changes,

anorexia, mucositis, dysphagia, or constitutional symptoms and laboratory changes as detailed in [Appendix 3](#). Toxicities will be managed as outlined in [Appendix 2](#). In addition, dosing may be held or stopped at the discretion of the treating investigator. Because confusion is a possible side effect of aldesleukin administration, a Durable Power of Attorney will be signed by the patient to identify a surrogate to make decisions if a patient becomes unable to make decisions. Neurological assessment will be performed daily on patients who are receiving aldesleukin.

### **3.4 POTENTIAL REPEAT TREATMENT**

Patients who were enrolled before the RP2D was established and have experienced a PR may be retreated at the RP2D ( $1 \times 10^{11}$  transduced E7 TCR cells). Additionally, patients who experienced a partial or complete response (at the RP2D Dose level 3) by RECIST criteria and subsequently progress by RECIST criteria may receive a second treatment course. Patients must continue to meet the original eligibility criteria to be considered for retreatment. Research assessments will be performed at the same time intervals used for initial treatment. Patients will be treated at the RP2D ( $1 \times 10^{11}$  transduced E7 TCR cells). Patients who develop grade 3 or 4 toxicity due to cell infusion will not be retreated. A maximum of 1 retreatment course may occur. The second treatment will not begin prior to 6-8 weeks after the last dose of aldesleukin.

Note: Response data for all treatments will be captured in the database however only the response data from the first treatment will be used in the determination of response.

### **3.5 ON STUDY EVALUATION**

Note: Refer to section [5](#) for research evaluations

#### **3.5.1 Prior to starting the preparative regimen**

- Apheresis as indicated
  - Within 14 days prior to starting the preparative regimen, patients will have a complete blood count (CBC with differential), electrolytes, BUN, creatinine, liver function tests, TBNK, and serum chemistries performed. If any results are beyond the criteria established for eligibility, the patient will not proceed until the abnormalities can be resolved.

#### **3.5.2 During the preparative regimen: (day -7 to cell infusion)**

- Tests will be performed every 1-2 days, including Complete Blood Count (CBC with differential) Chemistries: Sodium (Na), Potassium (K), Chloride (Cl), Total CO<sub>2</sub> (bicarbonate), Creatinine, Glucose, Urea nitrogen (BUN), Albumin, Calcium total, Magnesium total (Mg), Inorganic Phosphorus, Alkaline Phosphatase, ALT/GPT, AST/GOT, Total Bilirubin, Direct Bilirubin, LD, Total Protein, Total CK, Uric Acid
- E7 TCR assay may be collected 1-2 times per week following cell infusion
- Urinalysis (every 1-2 days)

#### **3.5.3 After Cell Infusion**

##### **3.5.3.1 Daily (Day +1 to Day +7)**

- Following cell administration - Vital signs will be monitored hourly (+/- 15 minutes) for four hours and then routinely (every 4-6 hours) unless otherwise clinically indicated

- CBC
- Chemistries: Sodium (Na), Potassium (K), Chloride (Cl), Total CO<sub>2</sub> (bicarbonate), Creatinine, Glucose, Urea nitrogen (BUN), Albumin, Alkaline Phosphatase, ALT/GPT, AST/GOT, Total Bilirubin, Direct Bilirubin
- Once total lymphocyte count is greater than 200/mm<sup>3</sup>, TBNK for peripheral blood CD4 count will be drawn weekly (within one business day, while the patient is hospitalized)
- Other tests will be performed as clinically indicated including Calcium total, Magnesium total (Mg), Phosphorus, LD, Total Protein, Total CK, Uric Acid

### 3.5.4 During Hospitalization

#### 3.5.4.1 Every 1-2 days

- A review of systems and physical exam as clinically indicated
- Tests will be performed as clinically indicated including Complete Blood Count (CBC with differential), Chemistries: Sodium (Na), Potassium (K), Chloride (Cl), Total CO<sub>2</sub> (bicarbonate), Creatinine, Glucose, Urea nitrogen (BUN), Albumin, Calcium total, Magnesium total (Mg), Inorganic Phosphorus, Alkaline Phosphatase, ALT/GPT, AST/GOT, Total Bilirubin, Direct Bilirubin, LD, Total Protein, Total CK, Uric Acid
- Once total lymphocyte count is greater than 200/mm<sup>3</sup>, TBNK for peripheral blood CD4 count will be drawn weekly Monday through Thursday (within one business day, while the patient is hospitalized).
- Surveillance blood cultures may be drawn at the discretion of the investigator and continue as clinically indicated.
- Other tests will be performed as clinically indicated.

### 3.6 POST TREATMENT EVALUATION (FOLLOW-UP)

At each scheduled evaluation for response, patients will undergo:

- Physical examination
- Chemistries: Sodium (Na), Potassium (K), Chloride (Cl), Total CO<sub>2</sub> (bicarbonate), Creatinine, Glucose, Urea nitrogen (BUN), Albumin, Calcium total, Magnesium total (Mg), Inorganic Phosphorus, Alkaline Phosphatase, ALT/GPT, AST/GOT, Total Bilirubin, Direct Bilirubin, LD, Total Protein, Total CK, Uric Acid
- Complete blood count
- Thyroid panel as clinically indicated
- TBNK, until CD4 > 200/mm<sup>3</sup> x 2
- Toxicity assessment, including a review of systems
- CT of the chest, abdomen and pelvis as clinically indicated. If clinically indicated, other scans or x-rays may be performed, e.g. PET, brain MRI, bone scan
- An approximately 5 liter apheresis may be performed at the first follow up visit, if the patient is unable to undergo apheresis, approximately 96 ml of blood may be obtained. Subsequently, approximately 60 ml of blood will be obtained at follow up visits for at least three months. Peripheral blood mononuclear cells will be cryopreserved so that immunologic testing may be performed and will be banked under protocol 16-C-0061

(ETIB Tissue Procurement Protocol). PBMC from apheresis will be stored in 10 vials at 100x10<sup>6</sup> cells per vial with remaining cells stored at 300x10<sup>6</sup> cells per vial.

### 3.6.1 Post Cell Product Administration

All patients will return to the NIH Clinical Center for evaluation 40 days (+/- 2 weeks) following administration of the cell product. Patients discharged with Grade 3 or greater significant adverse events should be evaluated by their referring physician within 2 weeks of discharge.

### 3.6.2 Stable Disease, Partial Response, Complete Response or Unresolved Toxicities

Patients who experience stable disease, a partial response, or a complete response or have unresolved toxicities will be evaluated for response as noted below:

- Week 12 (+/- 2 weeks)
- Every 3 months (+/- 1 month) x3
- Every 6 months (+/- 1 month) x 5 years
- As per PI discretion for subsequent years

**Note:** Patients may be seen more frequently as clinically indicated

### 3.6.3 Telephone Follow-up

Patients who are unable or unwilling to return for follow up evaluations will be followed via phone or e-mail contact and if there are any safety issues, will be advised to have a follow-up visit with their local oncologist. Patients may be asked to send laboratory, imaging and physician exam reports performed by their treating physician.

### 3.6.4 Long-Term Follow-up

Long-term follow up of patients receiving gene transfer is required by the FDA and must continue even after the patient comes off the study. Long-term follow-up will be done under a different protocol, 15C0141. After the patient comes off study, health status data will be obtained from surviving patients via telephone contact or mailed questionnaires for a total of 15 years after cell infusion.

## **3.7 CRITERIA FOR REMOVAL FROM PROTOCOL THERAPY AND OFF STUDY CRITERIA**

Prior to removal from study, effort must be made to have all subjects complete a safety visit approximately 40 days following the last dose of study therapy.

### 3.7.1 Off Treatment Criteria

Patients will be taken off treatment (and followed for survival) for the following:

- Completion of treatment
- Grade 3 or greater autoimmunity that involves vital organs (heart, kidneys, brain, eye, liver, colon, adrenal gland, lungs).
- If a subject experiences Grade 3 or higher toxicity due to cell infusion (reaction to cellular product or infusion reaction), the patient will receive no further treatment.
- Patient requests to be withdrawn from active therapy
- Investigator Discretion
- Positive pregnancy test

### 3.7.2 Off Study Criteria

Patients will be taken off study for the following:

- Screen failure
- The patient voluntarily withdraws
- There is significant noncompliance
- Progressive disease
- General or specific changes in the patient's condition which render continued participation unacceptable in the judgment of the investigator.
- Death
- Study closure
- Completion of study follow-up period
- Patient meets criteria listed in section **2.4.2**
- Patient lost to follow-up  
Investigator discretion

**Note:** patients who are taken off study for study closure may be followed on Protocol 15C0141.

### 3.7.3 Off Protocol Therapy and Off-Study Procedure

Authorized staff must notify Central Registration Office (CRO) when a subject is taken off protocol therapy and when a subject is taken off study. A Participant Status Update form from the web site (<http://home.ccr.cancer.gov/intra/eligibility/welcome.htm>) main page must be completed and sent via encrypted email to: NCI Central Registration Office [ncicentralregistration-1@mail.nih.gov](mailto:ncicentralregistration-1@mail.nih.gov).

### 3.8 SCHEDULE OF EVALUATIONS

For the treatment schedule, please refer to Section 3.2.3.

**Note:** the retreatment schedule (see Section 3.4) will be identical to the schedule for patients being treated for the first time, including eligibility assessments. A maximum of one course of treatment will be allowed on retreatment.

| Procedure                                        | Screening/<br>Baseline <sup>2</sup> | Before<br>treatment | Preparative<br>regimen <sup>5</sup> | Day 0           | During<br>hospitalization <sup>6</sup> | Follow-up <sup>9</sup><br>(End of Treatment) |
|--------------------------------------------------|-------------------------------------|---------------------|-------------------------------------|-----------------|----------------------------------------|----------------------------------------------|
| Medical history                                  | X                                   |                     |                                     |                 |                                        |                                              |
| Physical                                         | X                                   |                     |                                     | X               | X                                      | X                                            |
| ECOG performance status                          | X                                   |                     |                                     |                 |                                        |                                              |
| Neurological Assessment                          | X                                   |                     |                                     | X <sup>19</sup> | X <sup>19</sup>                        |                                              |
| NIH Advance Directives Form <sup>16</sup>        |                                     |                     |                                     |                 |                                        |                                              |
| Chest x-ray                                      | X                                   |                     |                                     |                 |                                        |                                              |
| EKG                                              | X                                   |                     |                                     |                 |                                        |                                              |
| Chest CT and MRI or PET                          | X                                   |                     |                                     |                 |                                        | X                                            |
| Pulmonary Function Test <sup>1</sup>             | X                                   |                     |                                     |                 |                                        |                                              |
| Cardiac evaluation <sup>10</sup>                 | X                                   |                     |                                     |                 |                                        |                                              |
| Viral titers                                     | X                                   |                     |                                     |                 |                                        |                                              |
| Biopsy                                           | X                                   |                     |                                     |                 |                                        | X <sup>12</sup>                              |
| Blood chemistries <sup>8</sup>                   | X                                   | X                   | X                                   |                 | X                                      | X                                            |
| Complete blood count (CBC with diff.)            | X                                   | X                   | X                                   |                 | X                                      | X                                            |
| Thyroid panel                                    | X                                   |                     |                                     |                 |                                        | X <sup>13</sup>                              |
| HLA typing                                       | X                                   |                     |                                     |                 |                                        |                                              |
| TBNK                                             |                                     | X                   |                                     |                 | X <sup>7</sup>                         | X                                            |
| Urinalysis                                       | X                                   |                     | X                                   |                 |                                        |                                              |
| Pregnancy test <sup>3</sup>                      | X                                   |                     |                                     |                 |                                        |                                              |
| Leukapheresis                                    |                                     | X <sup>17</sup>     |                                     |                 |                                        | X <sup>15</sup>                              |
| Infusion of transduced cells <sup>4</sup>        |                                     |                     |                                     | X               |                                        |                                              |
| Additional apheresis or blood draw <sup>11</sup> |                                     |                     |                                     |                 |                                        | X                                            |
| Research blood                                   | X                                   | X                   |                                     | X <sup>14</sup> |                                        | X                                            |
| E7 TCR assay <sup>18</sup>                       |                                     |                     |                                     |                 | X                                      | X                                            |



1. For patients with a prolonged history of cigarette smoking, as indicated in Section **2.2.1**
2. Exact timeline is indicated in Section **2.2**
3. For women of child-bearing potential as defined in Section **2.1.1.9**
4. See other treatments in Schedules, Section **3.2.3**
5. On days -7 to -1, every 1 -2 days as clinically indicated
6. Every 1 to 2 days while hospitalized
7. Once total lymphocyte count is greater than  $200/\text{mm}^3$ , TBNK for peripheral blood CD4 count will be drawn weekly (within one business day, while the patient is hospitalized)
8. Chemistries Sodium (Na), Potassium (K), Chloride (Cl), Total CO<sub>2</sub> (bicarbonate), Creatinine, Glucose, Urea nitrogen (BUN), Albumin, Calcium total, Magnesium total (Mg), Inorganic Phosphorus, Alkaline Phosphatase, ALT/GPT, AST/GOT, Total Bilirubin, Direct Bilirubin, LD, Total Protein, Total CK, Uric Acid
9. 40 days (+/- 2 weeks) after cell infusion, additional visits as indicated in Section **3.6**
10. For patients who are greater than or equal to 50 years of age, or who have a history of ischemic heart disease, chest pain or clinically significant atrial and/or ventricular arrhythmias. Patients with a LVEF of less than or equal to 45% will not be eligible, as noted in section **2.2.2**
11. As described in section **3.6**.
12. Following treatment (6 weeks post treatment preferred) and at disease progression only.
13. As clinically indicated
14. Monday, Wednesday, Friday during hospitalization once  $\text{ALC} > 200/\text{mm}^3$
15. If the patient is unable to undergo apheresis, approximately 96 ml of blood may be obtained. Apheresis will only be done in the first follow-up visit; in the following visits, blood will be collected.
16. As indicated in section **10.4**, all subjects will be offered the opportunity to complete an NIH advanced directives form. This should be done preferably at baseline but can be done at any time during the study as long as the capacity to do so is retained. The completion of the form is strongly recommended but is not required.
17. This can occur at any time prior to treatment on protocol 16C0061 if the patient is co-enrolled on that protocol. See Section **3.1.1** for further details. For patients undergoing retreatment, retreatment will only occur if there are enough cells stored from their prior course. See Section **3.4** for details on retreatment.
18. Clinical assay performed by the NCI Flow Cytometry Laboratory in the Laboratory of Pathology. The assay may be collected at follow-up visits.
19. Performed daily on patients while receiving aldesleukin.

## **4 CONCOMITANT MEDICATIONS/MEASURES**

Patients needing systemic steroid therapy may not participate in this study.

### **4.1 INFECTION PROPHYLAXIS**

**Note:** Other medications may be substituted or held at the discretion of the treating investigator. Below are guidelines and suggested medications and schedule to be used, however they can be altered by the treating physician as clinically indicated.

#### **4.1.1 Pneumocystis Jirovecii Pneumonia**

Patients may receive the fixed combination of trimethoprim and sulfamethoxazole [SMX] as double strength (DS) tab (DS tabs = TMP 160 mg/tab, and SMX 800 mg/tab) P.O. daily three times a week on non-consecutive days, beginning between days -8 and -5.

Pentamidine may be substituted for TMP/SMX-DS in patients with sulfa allergies. It may be administered aerosolized at 300 mg per nebulizer within one week of chemotherapy start date.

#### **4.1.2 Herpes Virus Prophylaxis**

Patients will be given either acyclovir 800mg PO twice daily (preferred) or valacyclovir 500mg PO twice daily (alternate) or, if unable to tolerate PO: acyclovir 250mg/m<sup>2</sup> IV q 12 hr. Reversible renal insufficiency has been reported with IV but not oral acyclovir. Neurologic toxicity including delirium, tremors, coma, acute psychiatric disturbances, and abnormal EEGs have been reported with higher doses of acyclovir. Should this occur, a dosage adjustment will be made or the drug will be discontinued. Acyclovir will not be used concomitantly with other nucleoside analogs which interfere with DNA synthesis, e.g. ganciclovir. In renal disease, the dose is adjusted as per product labeling.

Prophylaxis for Pneumocystis and Herpes will continue for 6 months post chemotherapy. If the CD4 count is less than 200 at six months post chemotherapy, prophylaxis will continue for at least six months and until the CD4 count is greater than 200 for two consecutive measures.

#### **4.1.3 Fungal Prophylaxis (Fluconazole)**

Patients may start Fluconazole 400 mg po. starting on the day of cell infusion and continue until the absolute neutrophil count is greater than 1000/mm<sup>3</sup>. The drug may be given IV at a dose of 400 mg in 0.9% sodium chloride USP daily in patients unable to take it orally.

#### **4.1.4 Empiric Antibiotics**

Patients will start on broad-spectrum antibiotics as per current institutional guidelines for fever of 38.3°C once or two temperatures of 38.0°C or above at least one hour apart, AND an ANC < 500/mm<sup>3</sup>. Infectious disease consultation will be obtained for all patients with unexplained fever or any infectious complications.

#### **4.1.5 Blood Product Support**

Using daily CBC's as a guide, the patient will receive platelets and packed red blood cells (PRBC's) as needed. As a general guideline, patients may be transfused for:

- Hemoglobin < 8 gm/dl
- Platelets < 10,000/mm<sup>3</sup>

Note: Patients may be transfused at a higher platelet count as clinically indicated, e.g.:

- Increased risk for bleeding such as undergoing an invasive procedure or presence of metastatic lesion likely to bleed
- fever greater than 38.5°C
- sepsis

All blood products will be irradiated. Leukocyte filters will be utilized for all blood and platelet transfusions to decrease sensitization to transfused WBC's and decrease the risk of CMV infection.

#### 4.1.6 Neutrophil Recovery

Patients may receive Filgrastim for count recovery when clinically indicated per NIH CC Pharmacy guidelines.

### 4.2 OTHER CONCOMITANT MEDICATIONS TO CONTROL SIDE EFFECTS

Concomitant medications to control side effects of therapy may be given. Meperidine (25-50 mg) will be given intravenously if severe chilling develops. Other supportive therapy will be given as required and may include acetaminophen (650 mg q4h), indomethacin (50-75 mg q8h) and ranitidine (150 mg q12h). If patients require steroid therapy they will be taken off treatment. Patients who require transfusions will receive irradiated blood products. Ondansetron 0.15 mg/kg/dose IV every 8 hours will be administered for nausea and vomiting. Additional anti-emetics will be administered as needed for nausea and vomiting uncontrolled by ondansetron. Antibiotic coverage for central venous catheters may be provided at the discretion of the investigator.

## 5 BIOSPECIMEN COLLECTION

### 5.1 CORRELATIVE STUDIES FOR RESEARCH

The amount of blood that may be drawn from adult patients for research purposes shall not exceed 10.5 mL/kg or 550mL; whichever is smaller, over any 8-week period.

#### 5.1.1 Pre-cell infusion evaluations

- At baseline/screening 12 CPT tube and 2 SST tubes may be collected. One CPT tube may be used to collect 4mL of plasma, which may be frozen in 4mL vials. PBMC from the remainder of the CPT tubes may be frozen in aliquots of  $10 \times 10^6$  cells/vial. Serum from SST tubes may be aliquoted into four vials of 0.5-1mL each. All samples will be processed in the ETIB Preclinical Development and Clinical Monitoring Facility (PDCMF).
- At day -7 prior to cell infusion 6 CPT tubes and 1 SST tube may be collected. One CPT tube may be used to collect 4mL of plasma, which may be frozen in 4mL vials. PBMC from the remainder of the CPT tubes may be frozen in aliquots of  $10 \times 10^6$  cells/vial. Serum from SST tubes may be aliquoted into four vials of 0.5-1mL each. All samples will be processed in the ETIB Preclinical Development and Clinical Monitoring Facility (PDCMF).

### 5.1.2 Post cell infusion evaluations

- 2 SST tube (4mL) may be collected daily for serum starting on the day of chemotherapy and continuing through the end of hospitalization. Serum will be processed in the ETIB Preclinical Development and Clinical Monitoring Facility (PDCMF). and may be aliquoted into four vials of 0.5-1 mL each.
- Once total lymphocyte count is greater than  $200/\text{mm}^3$ , the following samples may be drawn and sent to the ETIB Preclinical Development and Clinical Monitoring Facility (PDCMF). on Monday, Wednesday, and Friday x 5 days, then weekly (while the patient is hospitalized). Send to the PDCMF lab; Attention Jeremy Rose, Bldg 10, room 12C216 contact phone: 301-594-5339.
  - 6 CPT tubes (8mL each). One CPT tube daily may be used to collect 4mL of plasma, which may be frozen in 4mL vials. PBMC from the remainder of the CPT tubes may be frozen in aliquots of  $10 \times 10^6$  cells/vial
- Following discharge, at each scheduled follow-up visit 6 CPT tubes and 1 SST tube may be collected. One CPT tube may be used to collect 4mL of plasma, which may be frozen in 4mL vials. PBMC from the remainder of the CPT tubes may be frozen in aliquots of  $10 \times 10^6$  cells/vial. Serum from SST tubes may be aliquoted into four vials of 0.5-1mL each. All samples will be processed in the ETIB Preclinical Development and Clinical Monitoring Facility (PDCMF).
- Serum samples may be provided to the laboratory of Liang Cao, Genetics Branch, CCR for testing of plasma or serum for HPV DNA.

### 5.1.3 Tumor Biopsies

- Tumor may be biopsied pre- and post-treatment in order to test for HPV-16, HLA expression, and other characteristics that may affect response to therapy. Biopsies are not required; a maximum of three biopsies, with three cores/attempts, may be performed.
- Tissue may be obtained pre-treatment, following treatment (6 weeks post treatment preferred) and at the time of progression.
- Tissue may be obtained via CT, MRI or US guided biopsy under IV sedation as appropriate.
- Specimens will be transported by the assigned research nurse to Dr. Christian Hinrichs' lab for sample labeling. Contact: Scott Norberg, Bldg 10, phone 301-275-9668.
- Following labeling, samples will be transported by an assigned lab member to the ETIB Preclinical Development and Clinical Monitoring Facility (PDCMF). where they will be frozen in optimal cutting temperature compound. Contact: the PDCMF lab; Attention Jeremy Rose, Bldg 10, room 12C216 contact phone: 301-594-5339.
- Some of these samples will be archived and analyzed under another protocol 16-C-0061 (ETIB Tissue Procurement Protocol) if the subject is also enrolled on that study.

### 5.1.4 Immunological Testing

- Apheresis may be performed prior to and about four to six weeks after the treatment. Apheresis product will be transferred to the ETIB Preclinical Development and Clinical Monitoring Facility (PDCMF), PDCMF lab; Attention Jeremy Rose, Bldg 10, room

12C216. Contact phone: 301-594-5339. Cell product may be frozen in 10 vials at concentration  $100 \times 10^6$  cells/mL and additional vials at  $300 \times 10^6$  cells/mL.

- At other time points, peripheral blood lymphocytes (PBL) and plasma may be obtained from whole blood by purification using centrifugation. These samples will be transferred directly to the ETIB Preclinical Development and Clinical Monitoring Facility (PDCMF) lab for processing. Plasma may be frozen in 4mL vials. PBL may be frozen in aliquots of  $10 \times 10^6$  cells/vial
- Possible laboratory research studies on tumor biopsies are as follows: Expression of p16, CD3, CD4, CD8, MHC I, and MHC II by immunohistochemistry; flow cytometry to determine the frequency of E7 TCR T cells in the samples; generation and characterization of TIL cells; generation and characterization of tumor cell lines. IHC quantification may be by blinded scoring of the intensity and frequency of staining. Flow cytometry data will be analyzed with FlowJo software. Biopsies - will only be performed if minimal morbidity is expected based on the procedure performed and the granulocyte and platelet count.
- Possible laboratory research studies on PBMC and PBL are as follows: Specific cytotoxicity determined by impedance-based assay, frequency of effector cells as determined by ELISPOT, quantity of cytokine production as determined by coculture assay with cytokine quantification, cytokine production by intracellular flow cytometry, phenotypic analysis by flow cytometry. Immunological assays may be standardized by the inclusion of 1) pre-infusion PBMC and 2) an aliquot of the T cells cryopreserved at the time of infusion.
- Possible laboratory research on serum or plasma are as follows: HPV DNA quantification, cytokine quantification
- The planned methods for performing the laboratory studies above are as described in Stevanovic, et al, *Journal of Clinical Oncology*, 2015 and Draper, et al, *Clinical Cancer Research*, 2015. ([14](#), [15](#))
- The laboratory studies are considered exploratory. Statistical analysis will be performed in consultation with a biostatistician.
- Specimens collected in the course of this research project may be banked and used in the future to investigate new scientific questions related to this study and protocol 16-C-0061 (ETIB Tissue Procurement Protocol).

## **5.2 GENE-THERAPY-SPECIFIC FOLLOW-UP**

- Persistence of TCR transduced cells will be assessed by quantitative PCR and/or flow cytometry at follow-up visits 1, 3, 6 and 12 months after cell infusion, or until TCR-expressing cells are no longer detectable. If any patient shows an increasing population of TCR gene transduced T cells at month six or later (by FACS staining or qPCR), the previously archived samples will be subjected to techniques to identify predominant clonal populations of transduced cells that would suggest transformation. These cells will be obtained from the CPTs drawn for research at follow up visits or under the long term gene therapy follow up protocol (15C0141) if the patient is off study.

- Patients' blood samples will be obtained and undergo analysis for detection of replication competent retroviruses (RCR) by PCR prior to cell infusion and at 3, 6, and 12 months post cell administration. Blood samples will be archived annually thereafter if all previous testing has been negative with a brief clinical history. These cells will be obtained from the CPTs drawn for research at follow up visits or under the long-term gene therapy follow up protocol (15C0141) if the patient is off study.

### **5.3 SAMPLE STORAGE, TRACKING AND DISPOSITION**

#### **5.3.1 Storage/Tracking in the Preclinical Development and Clinical Monitoring Facility (PDCMF)**

- Samples will be ordered in CRIS and tracked through a Clinical Trial Data Management System. Should a CRIS screen not be available, the CRIS downtime procedures will be followed. Samples will not be sent outside NIH without appropriate approvals and/or agreements, if required.
- Patient blood and tissue samples, collected for the purpose of research under IRB approved protocols of the Experimental Transplantation and Immunotherapy Branch (ETIB), may be archived by the ETIB Preclinical Development and Clinical Monitoring Facility (PDCMF). All data associated with archived clinical research samples is entered into LabMatrix. Access is limited to PDCMF staff and ETIB clinical staff.
- The data recorded for each sample includes the patient ID, trial name/protocol number, date drawn, treatment cycle/post-transplant time point, cell source (e.g. peripheral blood, marrow,) as well as box and freezer location. Patient demographics that correlate treatment outcomes and therapies with the samples can be obtained only through the NCI/ETIB clinical records. As of January 2007, all newly received samples receive a unique bar code number, which is included in the sample record in the PDCMF database. Only this bar code is recorded on the sample vial and the vials will not be traceable back to patients without authorized access to the PDCMF database. All non-coded samples previously archived will be stripped of identifiers prior to distribution for any use other than as a primary objective of the protocol under which they were collected.
- Samples are stored in freezers. All samples will be labeled solely with a bar code (which includes the date, and serially determined individual sample identifier). The key will be available to a restricted number of ETIB investigators and associate investigators on the protocol. Coded samples will be stored frozen at -20°, -80° or liquid nitrogen vapor phase to -180 C according to the stability requirements in a single location under the restricted control of the PDCM Facility of ETIB.

These freezers are located onsite at the Preclinical Service laboratory (12C216) (-85° freezer) or in ETIB common equipment space (CRC/3-3273). Access to samples from a protocol for research purposes will be by permission of the Principal Investigator of that protocol in order to be used (1) for research purposes associated with protocol objectives for which the samples were collected, or (2) for a new research activity following submission and IRB approval of a new protocol and consent, or (3) for use only as unlinked or coded samples under the OHSRP Exemption Form guidelines stipulating that the activity is exempt from IRB review. Unused samples must be returned to the PDCMF

laboratory. Samples, and associated data, will be stored permanently unless the patient withdraws consent. If researchers have samples remaining once they have completed all studies associated with the protocol, they must be returned to the PDCMF laboratory.

### 5.3.2 Hinrichs Laboratory

Samples transferred to the Hinrichs laboratory will be barcoded and tracked with LabMatrix.

Laboratory research data will be stored on the NCI secure server in the Hinrichs laboratory folder with secure access by laboratory personnel only. Access to personally identifiable information (PII) is limited to the PI and study personnel who interact directly with the patient and their samples.

### 5.3.3 Protocol Completion/Sample Destruction

- Once research objectives for the protocol are achieved, researchers can request access to remaining samples, providing they have both approval of the Principal Investigator of the original protocol under which the samples or data were collected and either an IRB approved protocol and patient consent or an OHSRP exemption indicating that the activity is exempt from IRB review.
- The PDCMF and Liang Cao Lab staff will report to the Principal Investigator any destroyed samples, if samples become unsalvageable because of environmental factors (ex. broken freezer or lack of dry ice in a shipping container), lost in transit between facilities or misplaced by a researcher.
- The PI will record any loss or unanticipated destruction of samples as a deviation. Reporting will be per the requirements of section 7.1.

## 6 DATA COLLECTION AND EVALUATION

### 6.1 DATA COLLECTION

The PI will be responsible for overseeing entry of data into C3D, an in-house password protected electronic system and ensuring data accuracy, consistency and timeliness. The principal investigator, associate investigators/research nurses and/or a contracted data manager will assist with the data management efforts. All data obtained during the conduct of the protocol will be kept in secure network drives or in approved alternative sites that comply with NIH security standards. Primary and final analyzed data will have identifiers so that research data can be attributed to an individual human subject participant.

The key for assignment of patient code identification numbers with the personal identifiers will be stored in a secure data base. This key will not be shared with other investigators. Investigators conducting the individual sample testing will only have access to coded identification numbers and coded patient information (i.e. treatment regimens, treatment responses, diagnoses, pathology information).

**End of study procedures:** Data will be stored according to HHS, FDA regulations and NIH Intramural Records Retention Schedule as applicable.

**Loss or destruction of data:** Should we become aware that a major breach in our plan to protect subject confidentiality and trial data has occurred, this will be reported expeditiously per requirements in section **7.2.1**.

#### 6.1.1 Adverse Event (AE) Recording

All adverse events, including clinically significant abnormal findings on laboratory evaluations, regardless of severity, will be followed until return to baseline or stabilization of event. All study related adverse events, including clinically significant abnormal findings on laboratory evaluations, regardless of attribution will be captured in C3D up to 40 days following last administration of investigational agent. Document AEs from the first study intervention, Study Day 0, through 40 days after the study therapy was last administered. Beyond 40 days after the last administration, only adverse events which are serious and related to the study intervention need to be recorded.

In addition, all incidences of intubation including the duration of and reason for intubation will be captured in C3D.

#### 6.1.2 Reporting of Laboratory Events

An abnormal laboratory value will be considered an AE if the laboratory abnormality is characterized by any of the following:

- Results in discontinuation from the study
- Is associated with clinical signs or symptoms
- Requires treatment or any other therapeutic intervention
- Is associated with death or another serious adverse event, including hospitalization
- Is judged by the Investigator to be of significant clinical impact
- If any abnormal laboratory result is considered clinically significant, the investigator will provide details about the action taken with respect to the test drug and about the patient's outcome.

## 6.2 DATA SHARING PLANS

### 6.2.1 Human Data Sharing Plan

#### **What data will be shared?**

I will share human data generated in this research for future research as follows:

- Coded, linked data in an NIH-funded or approved public repository.
- Coded, linked data in BTRIS (automatic for activities in the Clinical Center)
- Coded, linked or identified data with approved outside collaborators under appropriate agreements.

#### **How and where will the data be shared?**

Data will be shared through:

- An NIH-funded or approved public repository: [ClinicalTrials.gov](https://clinicaltrials.gov).



- BTRIS (automatic for activities in the Clinical Center)
- Approved outside collaborators under appropriate individual agreements.
- Publication and/or public presentations.

**When will the data be shared?**

- Before publication.
- At the time of publication or shortly thereafter.

**6.3 RESPONSE CRITERIA**

For the purposes of this study, patients should be re-evaluated for response as indicated in Section 3.6.2. In addition to a baseline scan, confirmatory scans should also be obtained 4 to 8 weeks following initial documentation of objective response.

Response and progression will be evaluated in this study using the new international criteria proposed by the revised Response Evaluation Criteria in Solid Tumors (RECIST) guideline (version 1.1) for patients with solid tumors (22). In cases where patients have isolated bony metastases that do not meet RECIST criteria, Positron Emission Tomography Response Criteria in Solid Tumors (PERCIST) (version 1.0) guidelines will be used (23). Changes in the largest diameter (unidimensional measurement) of the tumor lesions and the shortest diameter in the case of malignant lymph nodes are used in the RECIST criteria. Normalization of standardized uptake value on FDG-PET is used in PERCIST. For patients that have both bony lesions and lesions that meet RECIST criteria, only RECIST criteria will be used to evaluate best overall response.

**6.3.1 Definitions**

Evaluable for toxicity: All patients will be evaluable for toxicity from the time of their first treatment with E7 TCR transduced PBL.

Evaluable for objective response: Only those patients who have measurable disease present at baseline, have received at least one cycle of therapy, and have had their disease re-evaluated will be considered evaluable for response. These patients will have their response classified according to the definitions stated below. (Note: Patients who exhibit objective disease progression prior to the end of cycle 1 will also be considered evaluable.)

Evaluable Non-Target Disease Response: Patients who have lesions present at baseline that are evaluable but do not meet the definitions of measurable disease, have received at least one cycle of therapy, and have had their disease re-evaluated will be considered evaluable for non-target disease. The response assessment is based on the presence, absence, or unequivocal progression of the lesions.

**6.3.2 Disease Parameters**

Measurable disease: Measurable lesions are defined as those that can be accurately measured in at least one dimension (longest diameter to be recorded) as:

- By chest x-ray:  $\geq 20$  mm;
- By CT scan:
  - Scan slice thickness 5 mm or under: as  $\geq 10$  mm

- Scan slice thickness > 5 mm: double the slice thickness
- With calipers on clinical exam:  $\geq 10$  mm.

All tumor measurements must be recorded in millimeters (or decimal fractions of centimeters).

Malignant lymph nodes: To be considered pathologically enlarged and measurable, a lymph node must be  $\geq 15$  mm in short axis when assessed by CT scan (CT scan slice thickness recommended to be no greater than 5 mm). At baseline and in follow-up, only the short axis will be measured and followed.

Measurable bone metastases: Any size bone lesions with a baseline SUL (standard uptake value, corrected for lean body mass) on FDG-PET of  $1.5 \times$  mean liver SUL + 2 standard deviations of mean SUL is considered measurable. Bone lesions are only measured in patients with isolated bone metastases.

Non-measurable disease. All other lesions (or sites of disease), including small lesions (longest diameter <10 mm or pathological lymph nodes with  $\geq 10$  to <15 mm short axis), are considered non-measurable disease. Leptomeningeal disease, ascites, pleural/pericardial effusions, lymphangitis cutis/pulmonitis, inflammatory breast disease, and abdominal masses (not followed by CT or MRI), are considered as non-measurable.

Target lesions. All measurable lesions up to a maximum of 2 lesions per organ and 5 lesions in total, representative of all involved organs, should be identified as **target lesions** and recorded and measured at baseline. Target lesions should be selected on the basis of their size (lesions with the longest diameter), be representative of all involved organs, but in addition should be those that lend themselves to reproducible repeated measurements. It may be the case that, on occasion, the largest lesion does not lend itself to reproducible measurement in which circumstance the next largest lesion which can be measured reproducibly should be selected. A sum of the diameters (longest for non-nodal lesions, short axis for nodal lesions) for all target lesions will be calculated and reported as the baseline sum diameters. If lymph nodes are to be included in the sum, then only the short axis is added into the sum. The baseline sum diameters will be used as reference to further characterize any objective tumor regression in the measurable dimension of the disease. Lesions that have been previously treated with loco-regional therapy or in a previously irradiated area can be considered target lesions if they have demonstrated unequivocal progression by radiographic imaging.

Non-target lesions. All other lesions (or sites of disease) including any measurable lesions over and above the 5 target lesions should be identified as **non-target lesions** and should also be recorded at baseline. Measurements of these lesions are not required, but the presence, absence, or in rare cases unequivocal progression of each should be noted throughout follow-up.

### 6.3.3 Methods for Evaluation of Measurable Disease

All measurements should be taken and recorded in metric notation using a ruler or calipers. All baseline evaluations should be performed as closely as possible to the beginning of treatment and never more than 4 weeks before the beginning of the treatment.

The same method of assessment and the same technique should be used to characterize each identified and reported lesion at baseline and during follow-up. Imaging-based evaluation is

preferred to evaluation by clinical examination unless the lesion(s) being followed cannot be imaged but are assessable by clinical exam.

Clinical lesions: Clinical lesions will only be considered measurable when they are superficial (e.g., skin nodules and palpable lymph nodes) and  $\geq 10$  mm diameter as assessed using calipers (e.g., skin nodules). In the case of skin lesions, documentation by color photography, including a ruler to estimate the size of the lesion, is recommended.

Conventional CT and MRI: This guideline has defined measurability of lesions on CT scan based on the assumption that CT slice thickness is 5 mm or less. If CT scans have slice thickness greater than 5 mm, the minimum size for a measurable lesion should be twice the slice thickness. MRI is also acceptable in certain situations (e.g. for body scans). Ideally, the same type of scanner should be used and the image acquisition protocol should be followed as closely as possible to prior scans. Body scans should be performed with breath-hold scanning techniques, if possible.

FDG-PET: Patients with isolated bony metastases will have FDG-PET to determine if lesions meet criteria to be followed by PERCIST version 1.0. While FDG-PET response assessments in solid tumors being followed by RECIST need additional study, it is sometimes reasonable to incorporate the use of FDG-PET scanning to complement CT scanning in assessment of progression of lesions (particularly possible 'new' disease). New lesions on the basis of FDG-PET imaging can be identified according to the following algorithm:

- a. Negative FDG-PET at baseline, with a positive FDG-PET at follow-up is a sign of PD based on a new lesion.
- b. No FDG-PET at baseline and a positive FDG-PET at follow-up: If the positive FDG-PET at follow-up corresponds to a new site of disease confirmed by CT, this is PD. If the positive FDG-PET at follow-up is not confirmed as a new site of disease on CT, additional follow-up CT scans are needed to determine if there is truly progression occurring at that site (if so, the date of PD will be the date of the initial abnormal FDG-PET scan). If the positive FDG-PET at follow-up corresponds to a pre-existing site of disease on CT that is not progressing on the basis of the anatomic images, this is not PD.
- c. FDG-PET may be used to upgrade a response to a CR in a manner similar to a biopsy in cases where a residual radiographic abnormality is thought to represent fibrosis or scarring. The use of FDG-PET in this circumstance should be prospectively described in the protocol and supported by disease-specific medical literature for the indication. However, it must be acknowledged that both approaches may lead to false positive CR due to limitations of FDG-PET and biopsy resolution/sensitivity.

Note: A 'positive' FDG-PET scan lesion means one which is FDG avid with an uptake greater than twice that of the surrounding tissue on the attenuation corrected image.

#### 6.3.4 Response Criteria

##### 6.3.4.1 Evaluation of Target Solid Lesions

Complete Response (CR): Disappearance of all target lesions. Any pathological lymph nodes (whether target or non-target) must have reduction in short axis to  $< 10$  mm.

Partial Response (PR): At least a 30% decrease in the sum of the diameters of target lesions, taking as reference the baseline sum of diameters.

Progressive Disease (PD): At least a 20% increase in the sum of the diameters of target lesions, taking as reference the smallest sum on study (this includes the baseline sum if that is the smallest on study). In addition to the relative increase of 20%, the sum must also demonstrate an absolute increase of at least 5 mm. (Note: the appearance of one or more new lesions is also considered progressions).

Stable Disease (SD): Neither sufficient shrinkage to qualify for PR nor sufficient increase to qualify for PD, taking as reference the smallest sum of diameters while on study.

#### 6.3.4.2 Evaluation of Bony Lesions in Patients with Isolated Bone Metastases

Complete Response (CR): Normalization of all bony lesions (target and nontarget) to SUL less than mean liver SUL and equal to normal surrounding tissue SUL. Verification with follow-up study in 1 month if anatomic criteria indicate disease progression.

Partial Response (PR): > 30% decrease in SUL peak; minimum 0.8 unit decrease. Verification with follow-up study if anatomic criteria indicate disease progression.

Progressive Disease (PD): > 30% increase in SUL peak (minimum 0.8 unit increase in SUL peak), > 75% increase in TLG of the 5 most active lesions, Visible increase in extent of FDG uptake, or new lesions. Verification with follow-up study if anatomic criteria indicate complete or partial response.

Stable Disease (SD): Does not meet other criteria.

#### 6.3.4.3 Evaluation of Non-Target Lesions

Complete Response (CR): Disappearance of all non-target lesions and normalization of tumor marker level. All lymph nodes must be non-pathological in size (<10 mm short axis).

Note: If tumor markers are initially above the upper normal limit, they must normalize for a patient to be considered in complete clinical response.

Non-CR/Non-PD: Persistence of one or more non-target lesion(s) and/or maintenance of tumor marker level above the normal limits.

Progressive Disease (PD): Appearance of one or more new lesions and/or *unequivocal progression* of existing non-target lesions. *Unequivocal progression* should not normally trump target lesion status. It must be representative of overall disease status change, not a single lesion increase.

Although a clear progression of “non-target” lesions only is exceptional, the opinion of the treating physician should prevail in such circumstances, and the progression status should be confirmed at a later time by the review panel (or Principal Investigator).

#### 6.3.4.4 Evaluation of Best Overall Response

The best overall response is the best response recorded from the start of the treatment until disease progression/recurrence (taking as reference for progressive disease the smallest measurements recorded since the treatment started). The patient's best response assignment will depend on the achievement of both measurement and confirmation criteria.

**For Patients with Measurable Tumors (i.e., Target Disease)**

| Target Lesions                                                                                                                                                                                                                                                                                                                                                                                                                                                                                                                                                                                                                                              | Non-Target Lesions          | New Lesions | Overall Response | Best Overall Response when Confirmation is Required* |
|-------------------------------------------------------------------------------------------------------------------------------------------------------------------------------------------------------------------------------------------------------------------------------------------------------------------------------------------------------------------------------------------------------------------------------------------------------------------------------------------------------------------------------------------------------------------------------------------------------------------------------------------------------------|-----------------------------|-------------|------------------|------------------------------------------------------|
| CR                                                                                                                                                                                                                                                                                                                                                                                                                                                                                                                                                                                                                                                          | CR                          | No          | CR               | ≥4 wks. Confirmation**                               |
| CR                                                                                                                                                                                                                                                                                                                                                                                                                                                                                                                                                                                                                                                          | Non-CR/Non-PD               | No          | PR               | ≥4 wks. Confirmation**                               |
| CR                                                                                                                                                                                                                                                                                                                                                                                                                                                                                                                                                                                                                                                          | Not evaluated               | No          | PR               |                                                      |
| PR                                                                                                                                                                                                                                                                                                                                                                                                                                                                                                                                                                                                                                                          | Non-CR/Non-PD/not evaluated | No          | PR               |                                                      |
| SD                                                                                                                                                                                                                                                                                                                                                                                                                                                                                                                                                                                                                                                          | Non-CR/Non-PD/not evaluated | No          | SD               | Documented at least once ≥4 wks. from baseline**     |
| PD                                                                                                                                                                                                                                                                                                                                                                                                                                                                                                                                                                                                                                                          | Any                         | Yes or No   | PD               | no prior SD, PR or CR                                |
| Any                                                                                                                                                                                                                                                                                                                                                                                                                                                                                                                                                                                                                                                         | PD***                       | Yes or No   | PD               |                                                      |
| Any                                                                                                                                                                                                                                                                                                                                                                                                                                                                                                                                                                                                                                                         | Any                         | Yes         | PD               |                                                      |
| <p>* See RECIST 1.1 manuscript for further details on what is evidence of a new lesion.</p> <p>** Only for non-randomized trials with response as primary endpoint.</p> <p>*** In exceptional circumstances, unequivocal progression in non-target lesions may be accepted as disease progression.</p> <p><u>Note:</u> Patients with a global deterioration of health status requiring discontinuation of treatment without objective evidence of disease progression at that time should be reported as “<i>symptomatic deterioration</i>.” Every effort should be made to document the objective progression even after discontinuation of treatment.</p> |                             |             |                  |                                                      |

**For Patients with Non-Measurable Disease (i.e., Non-Target Disease)**

| Non-Target Lesions | New Lesions | Overall Response |
|--------------------|-------------|------------------|
| CR                 | No          | CR               |
| Non-CR/non-PD      | No          | Non-CR/non-PD*   |
| Not all evaluated  | No          | not evaluated    |
| Unequivocal PD     | Yes or No   | PD               |
| Any                | Yes         | PD               |

\* 'Non-CR/non-PD' is preferred over 'stable disease' for non-target disease since SD is increasingly used as an endpoint for assessment of efficacy in some trials so to assign this category when no lesions can be measured is not advised

### 6.3.5 Duration of Response

Duration of overall response: The duration of overall response is measured from the time measurement criteria are met for CR or PR (whichever is first recorded) until the first date that recurrent or progressive disease is objectively documented (taking as reference for progressive disease the smallest measurements recorded since the treatment started).

The duration of overall CR is measured from the time measurement criteria are first met for CR until the first date that progressive disease is objectively documented.

Duration of stable disease: Stable disease is measured from the start of the treatment until the criteria for progression are met, taking as reference the smallest measurements recorded since the treatment started, including the baseline measurements.

## 6.4 TOXICITY CRITERIA

Careful evaluation to ascertain the toxicity, immunologic effects and anti-tumor efficacy of the treatment regimens will be performed. This study will utilize the CTCAE version 4.0 for toxicity and adverse event reporting. A copy of the CTCAE version 4.0 can be downloaded from the website <http://ctep.cancer.gov>. All appropriate treatment areas should have access to a copy of the CTCAE version 4.0. A copy of the CTCAE version 4.0 can be downloaded from the CTEP web site ([http://ctep.cancer.gov/protocolDevelopment/electronic\\_applications/ctc.htm#ctc\\_40](http://ctep.cancer.gov/protocolDevelopment/electronic_applications/ctc.htm#ctc_40)).

## 7 NIH REPORTING REQUIREMENTS/DATA AND SAFETY MONITORING PLAN

### 7.1 DEFINITIONS

Please refer to definitions provided in Policy 801: Reporting Research Events found [here](#).

### 7.2 OHSRP OFFICE OF COMPLIANCE AND TRAINING/IRB REPORTING

#### 7.2.1 Expedited Reporting

7.2.2 Please refer to the reporting requirements in Policy 801: Reporting Research Events and Policy 802 Non-Compliance Human Subjects Research found [here](#). Note: Only IND Safety Reports that meet the definition of an unanticipated problem will need to be reported per these policies. IRB Requirements for PI Reporting at Continuing Review

Please refer to the reporting requirements in Policy 801: Reporting Research Events found [here](#).

### 7.3 NCI CLINICAL DIRECTOR REPORTING

Problems expeditiously reported to the OHSRP in iRIS will also be reported to the NCI Clinical Director. A separate submission is not necessary as reports in iRIS will be available to the Clinical Director.

In addition to those reports, all deaths that occur within 30 days after receiving a research intervention should be reported via email to the Clinical Director unless they are due to progressive disease.

To report these deaths, please send an email describing the circumstances of the death to Dr. Dahut at [NCICCRQA@mail.nih.gov](mailto:NCICCRQA@mail.nih.gov) within one business day of learning of the death.

#### **7.4 INSTITUTIONAL BIOSAFETY COMMITTEE (IBC) REPORTING CRITERIA**

##### 7.4.1 Serious Adverse Event Reports to IBC

The Principal Investigator (or delegate) will notify IBC of any unexpected fatal or life-threatening experience associated with the use of E7 TCR transduced PBL cells as soon as possible but in no event later than 7 calendar days of initial receipt of the information. Serious adverse events that are unexpected and associated with the use of the E7 TCR transduced PBL, but are not fatal or life-threatening, must be reported to the NIH IBC as soon as possible, but not later than 15 calendar days after the investigator's initial receipt of the information. Adverse events may be reported by using the FDA Form 3500a.

##### 7.4.2 Annual Reports to IBC

Within 60 days after the one-year anniversary of the date on which the IBC approved the initial protocol, and after each subsequent anniversary until the trial is completed, the Principal Investigator (or delegate) shall submit the information described below. Alternatively, the IRB continuing review report can be sent to the IBC in lieu of a separate report. Please include the IBC protocol number on the report.

###### 7.4.2.1 Clinical Trial Information

A brief summary of the status of the trial in progress or completed during the previous year. The summary is required to include the following information:

- the title and purpose of the trial
- clinical site
- the Principal Investigator
- clinical protocol identifiers;
- participant population (such as disease indication and general age group, e.g., adult or pediatric);
- the total number of participants planned for inclusion in the trial; the number entered into the trial to date whose participation in the trial was completed; and the number who dropped out of the trial with a brief description of the reasons
- the status of the trial, e.g., open to accrual of subjects, closed but data collection ongoing, or fully completed,
- if the trial has been completed, a brief description of any study results.

###### 7.4.2.2 Progress Report and Data Analysis

Information obtained during the previous year's clinical and non-clinical investigations, including:

- a narrative or tabular summary showing the most frequent and most serious adverse experiences by body system

- a summary of all serious adverse events submitted during the past year
- a summary of serious adverse events that were expected or considered to have causes not associated with the use of the gene transfer product such as disease progression or concurrent medications
- if any deaths have occurred, the number of participants who died during participation in the investigation and causes of death
- a brief description of any information obtained that is pertinent to an understanding of the gene transfer product's actions, including, for example, information about dose-response, information from controlled trials, and information about bioavailability.

## **7.5 NIH REQUIRED DATA AND SAFETY MONITORING PLAN**

### **7.5.1 Principal Investigator/Research Team**

The clinical research team will meet on a regular biweekly basis when patients are being actively treated on the trial to discuss each patient. Decisions about dose level enrollment and dose escalation if applicable will be made based on the toxicity data from prior patients.

All data will be collected in a timely manner and reviewed by the principal investigator. Events meeting requirements for expedited reporting as described in section [7.2.1](#) will be submitted within the appropriate timelines.

The principal investigator will review adverse event and response data on each patient to ensure safety and data accuracy. The principal investigator will personally conduct or supervise the investigation and provide appropriate delegation of responsibilities to other members of the research staff.

### **7.5.2 Safety Monitoring Committee (SMC)**

This protocol will require oversight from the Safety Monitoring Committee (SMC). Initial review will occur as soon as possible after the annual NIH Intramural IRB continuing review date. Subsequently, each protocol will be reviewed as close to annually as the quarterly meeting schedule permits or more frequently as may be required by the SMC. For initial and subsequent reviews, protocols will not be reviewed if there is no accrual within the review period. Written outcome letters will be generated in response to the monitoring activities and submitted to the Principal investigator and Clinical Director or Deputy Clinical Director, CCR, NCI.

## **8 SPONSOR PROTOCOL/SAFETY REPORTING**

### **8.1 DEFINITIONS**

#### **8.1.1 Adverse Event**

Any untoward medical occurrence in a patient or clinical investigation subject administered a pharmaceutical product and which does not necessarily have a causal relationship with this treatment. An adverse event (AE) can therefore be any unfavorable and unintended sign (including an abnormal laboratory finding), symptom, or disease temporally associated with the use of a medicinal (investigational) product, whether or not related to the medicinal (investigational) product (ICH E6 (R2))



### 8.1.2 Serious Adverse Event (SAE)

An adverse event or suspected adverse reaction is considered serious if in the view of the investigator or the sponsor, it results in any of the following:

- Death,
- A life-threatening adverse event (see section [8.1.3](#))
- Inpatient hospitalization or prolongation of existing hospitalization
  - A hospitalization/admission that is pre-planned (i.e., elective or scheduled surgery arranged prior to the start of the study), a planned hospitalization for pre-existing condition, or a procedure required by the protocol, without a serious deterioration in health, is not considered a serious adverse event.
  - A hospitalization/admission that is solely driven by non-medical reasons (e.g., hospitalization for patient convenience) is not considered a serious adverse event.
  - Emergency room visits or stays in observation units that do not result in admission to the hospital would not be considered a serious adverse event. The reason for seeking medical care should be evaluated for meeting one of the other serious criteria.
- Persistent or significant incapacity or substantial disruption of the ability to conduct normal life functions
- A congenital anomaly/birth defect
- Important medical events that may not result in death, be life-threatening, or require hospitalization may be considered a serious adverse drug experience when, based upon appropriate medical judgment, they may jeopardize the patient or subject and may require medical or surgical intervention to prevent one of the outcomes listed in this definition.

### 8.1.3 Life-threatening

An adverse event or suspected adverse reaction is considered "life-threatening" if, in the view of either the investigator or sponsor, its occurrence places the patient or subject at immediate risk of death. It does not include an adverse event or suspected adverse reaction that, had it occurred in a more severe form, might have caused death. (21CFR312.32)

### 8.1.4 Severity

The severity of each Adverse Event will be assessed utilizing the CTCAE version 4.0.

### 8.1.5 Relationship to Study Product

All AEs will have their relationship to study product assessed using the terms: related or not related.

- Related – There is a reasonable possibility that the study product caused the adverse event. Reasonable possibility means that there is evidence to suggest a causal relationship between the study product and the adverse event.

- Not Related – There is not a reasonable possibility that the administration of the study product caused the event.

## **8.2 ASSESSMENT OF SAFETY EVENTS**

AE information collected will include event description, date of onset, assessment of severity and relationship to study product and alternate etiology (if not related to study product), date of resolution of the event, seriousness and outcome. The assessment of severity and relationship to the study product will be done only by those with the training and authority to make a diagnosis and listed on the Form FDA 1572 as the site principal investigator or sub-investigator. AEs occurring during the collection and reporting period will be documented appropriately regardless of relationship. AEs will be followed through resolution.

SAEs will be:

- Assessed for severity and relationship to study product and alternate etiology (if not related to study product) by a licensed study physician listed on the Form FDA 1572 as the site principal investigator or sub-investigator.
- Recorded on the appropriate SAE report form, the medical record and captured in the clinical database.
- Followed through resolution by a licensed study physician listed on the Form FDA 1572 as the site principal investigator or sub-investigator.

For timeframe of recording adverse events, please refer to section 6.1. All serious adverse events recorded from the time of first investigational product administration must be reported to the sponsor with the exception of any listed in section 8.4.

## **8.3 REPORTING OF SERIOUS ADVERSE EVENTS**

Any AE that meets protocol-defined serious criteria or meets the definition of Adverse Event of Special Interest that require expedited reporting must be submitted immediately (within 24 hours of awareness) to OSRO Safety using the CCR SAE report form. Any exceptions to the expedited reporting requirements are found in section 8.4.

All SAE reporting must include the elements described in section 8.2.

SAE reports will be submitted to the Center for Cancer Research (CCR) at:

[OSROSafety@mail.nih.gov](mailto:OSROSafety@mail.nih.gov) and to the CCR PI and study coordinator. CCR SAE report form and instructions can be found at:

<https://ccrod.cancer.gov/confluence/pages/viewpage.action?pageId=157942842>

Following the assessment of the SAE by OSRO, other supporting documentation of the event may be requested by the OSRO Safety and should be provided as soon as possible.

## **8.4 WAIVER OF EXPEDITED REPORTING TO CCR**

Hematological toxicities as outlined below will not be included in expedited reporting to CCR because these are expected toxicities from the conditioning regimen (commercial product):

| <b>CTCAE System Organ Class</b>      | <b>Adverse Event</b>                                  | <b>Grade</b>   | <b>Prolongation of Hospitalization</b> | <b>Expected Frequency</b> | <b>Attribution</b>                                    |
|--------------------------------------|-------------------------------------------------------|----------------|----------------------------------------|---------------------------|-------------------------------------------------------|
| Investigations                       | Neutrophil count decreased                            | 1-3            | Expected                               | 100%                      | Commercial Product (Cyclophosphamide and fludarabine) |
| Investigations                       | Neutrophil count decreased                            | 4 if < 14 days | Expected                               | 100%                      | Commercial Product (Cyclophosphamide and fludarabine) |
| Blood and lymphatic system disorders | Anemia                                                | 1-3            | Expected                               | 100%                      | Commercial Product (Cyclophosphamide and fludarabine) |
| Investigations                       | Platelet count decreased                              | 1-3            | Expected                               | 100%                      | Commercial Product (Cyclophosphamide and fludarabine) |
| Investigations                       | Platelet count decreased                              | 4 if < 14 days | Expected                               | 100%                      | Commercial Product (Cyclophosphamide and fludarabine) |
| Investigations                       | White blood cell decreased                            | 1-4            | Expected                               | 100%                      | Commercial Product (Cyclophosphamide and fludarabine) |
| Investigations                       | Lymphocyte count decreased                            | 1-4            | Expected                               | 100%                      | Commercial Product (Cyclophosphamide and fludarabine) |
| Investigations                       | CD4 lymphocytes decreased                             | 1-4            | Expected                               | 100%                      | Commercial Product (Cyclophosphamide and fludarabine) |
| Blood and lymphatic system disorders | febrile neutropenia (without an associated infection) | 3              | Expected                               | 100%                      | Commercial Product (Cyclophosphamide and fludarabine) |

The PI will submit a summary table of all grade 3-5 events, whether or not considered related to the product, every 6 months. The report shall include the number of patients treated in the timeframe, the number of events per AE term per grade which occurred in the 6-month timeframe and in total since the start of the study, attribution, and type/category of serious.

Reports will be submitted to the Center for Cancer Research (CCR) at [OSROSafety@mail.nih.gov](mailto:OSROSafety@mail.nih.gov)

The Sponsor might request case summaries for those events if, upon review, the Sponsor determines that an aggregate safety report is required (21CFR312.32(c)(1)(iv)).

## **8.5 SAFETY REPORTING CRITERIA TO THE PHARMACEUTICAL COLLABORATORS**

Reporting will be per the collaborative agreement.

## **8.6 REPORTING PREGNANCY**

### **8.6.1 Maternal exposure**

If a patient becomes pregnant during the course of the study, the study treatment should be discontinued immediately, and the pregnancy reported to the Sponsor no later than 24 hours of when the Investigator becomes aware of it. The Investigator should notify the Sponsor no later than 24 hours of when the outcome of the Pregnancy becomes known,

Pregnancy itself is not regarded as an SAE. However, congenital abnormalities or birth defects and spontaneous miscarriages that meet serious criteria (section **8.1.2**) should be reported as SAEs.

The outcome of all pregnancies (spontaneous miscarriage, elective termination, ectopic pregnancy, normal birth, or congenital abnormality) should be followed up and documented.

### **8.6.2 Paternal exposure**

Male patients should refrain from fathering a child or donating sperm during the study and for 4 months after the last dose of (*insert drug name*).

Pregnancy of the patient's partner is not considered to be an AE. However, the outcome of all pregnancies (spontaneous miscarriage, elective termination, ectopic pregnancy, normal birth, or congenital abnormality) occurring from the date of the first dose until 4 months after the last dose should, if possible, be followed up and documented.

## **8.7 REGULATORY REPORTING FOR STUDIES CONDUCTED UNDER CCR-SPONSORED IND**

Following notification from the investigator, CCR, the IND sponsor, will report any suspected adverse reaction that is both serious and unexpected in expedited manner to the FDA in accordance to 21 CFR 312.32. CCR will report an AE as a suspected adverse reaction only if there is evidence to suggest a causal relationship between the study product and the adverse event. CCR will notify FDA and all participating investigators (i.e., all investigators to whom the sponsor is providing drug under its INDs or under any investigator's IND) in an IND safety report of potential serious risks from clinical trials or any other source, as soon as possible, in accordance to 21 CFR Part 312.32.

All serious events will be reported to the FDA at least annually in a summary format.

## **9 CLINICAL MONITORING**

As a sponsor for clinical trials, FDA regulations require the CCR to maintain a monitoring program. The CCR's program allows for confirmation of: study data, specifically data that could

affect the interpretation of primary and secondary study endpoints; adherence to the protocol, regulations, ICH E6, and SOPs; and human subjects protection. This is done through independent verification of study data with source documentation focusing on:

- Informed consent process
- Eligibility confirmation
- Drug administration and accountability
- Adverse events monitoring
- Response assessment.

The monitoring program also extends to multi-site research when the CCR is the coordinating center.

This trial will be monitored by personnel employed by a CCR contractor. Monitors are qualified by training and experience to monitor the progress of clinical trials. Personnel monitoring this study will not be affiliated in any way with the trial conduct.

## **10 STATISTICAL CONSIDERATIONS**

For Phase I, the objective of this study is to determine a safe dose for E7 TCR cells plus aldesleukin for the treatment of metastatic HPV-16+ cancers. The study may require up to 6 patients per dose level. For purposes of sample size estimation, we will assume that as few as 9 and no more than 18 patients will be required to perform the initial safety evaluation for E7 during the phase I portion. As of March 2<sup>nd</sup>, 2018 a total of 9 patients have been treated with no dose-limiting toxicities encountered.

### **With Amendment H**

A total of 40 patients will be treated, including the 3 additional patients added to dose level 3 via amendment G to confirm safety.

These patients will be evaluated for efficacy and for safety as follows. With 40 patients treated at a single dose level, there will be 90% power to rule out a 10% overall response rate (PR +CR) in favor of a targeted alternative response rate of 25%, with a one-sided 0.10 significance level exact binomial test. These levels were selected to account for a variety of tumor types which may have varying degrees of response. In practice, if there are 7 responses out of 40 patients (17.5%), then the lower one-sided exact 90% confidence bound about this fraction is 10.0%, which matches the level to be ruled out. Thus, 7 responses in 40 patients would be considered a minimally acceptable overall response rate for the cohort. After the trial, the results obtained will be reported along with a one-sided lower 90% confidence interval bound as well as two-tailed 80% and 95% confidence intervals.

In addition, to ensure that enrollment to the RP2D level is not continued if response rates are insufficient, an early stopping rule will be imposed. If after 21 evaluable patients there are 0 or 1 responses, then no further patients will be enrolled as soon as this can be determined because the upper one-sided exact 90% confidence interval bound on 1/21 is 17.3%, which is marginally inconsistent with the intended 7/40 (17.5%) minimally necessary to consider the results to be positive overall.

This cohort of 40 patients may consist of patients with any of 6 possible tumor types, but all of which are HPV-16+. As such, they will be considered together for a primary evaluation because of this common characteristic. In addition to evaluating the results in the full set of 40 patients, there will be individual exploratory evaluations of response for the patients according to their type of tumor along with 80% and 95% two-sided confidence intervals. The results obtained in this exploratory fashion may be used to guide parameter selection for subsequent trials if appropriate.

Monitoring for safety will take place in the full set of 40 patients as well. If after the initial 6 patients are treated at the RP2D with 0-1 of 6 patients having a DLT, at any point the fraction of patients who experience a DLT is 33% or greater, then no further patients will be enrolled into this cohort of up to 40 evaluable patients treated at the RP2D.

As indicated in section 3.4, patients may be re-enrolled on the study as new patients to allow re-treatment, and these patients will be considered both times in the total accrual ceiling for the study. This re-enrollment of patients will not be used in the analysis of the 40-patient cohort.

The accrual ceiling will be set at 180 to allow for non-evaluable subjects and screen failures. Provided that about 2 patients every month will be enrolled onto this trial, with a 4-week time frame between each dose level, approximately 1 ½ - 2 years may be needed to accrue the maximum number of patients.

## **11 COLLABORATIVE AGREEMENTS**

De-identified samples may be provided to Kite Pharma for assistance in performing the research studies described in section 5.1. Kite Pharma is collaborating in the development of the E7 TCR. A CRADA between NCI and Kite Pharma is in place (CRADA # 03022). Kite Pharma will be providing funding for this study.

## **12 HUMAN SUBJECTS PROTECTIONS**

### **12.1 RATIONALE FOR SUBJECT SELECTION**

The patients to be entered in this protocol have metastatic or recurrent/refractory locally advanced HPV-associated cancer that is refractory to standard therapy, and limited life expectancies.

Subjects from both genders and all racial/ethnic groups are eligible for this study if they meet the eligibility criteria. To date, there is no information that suggests that differences in drug metabolism or disease response would be expected in one group compared to another. Efforts will be made to extend accrual to a representative population, but in this preliminary study, a balance must be struck between patient safety considerations and limitations on the number of individuals exposed to potentially toxic and/or ineffective treatments on the one hand and the need to explore gender and ethnic aspects of clinical research on the other hand. If differences in outcome that correlate to gender or to ethnic identity are noted, accrual may be expanded or a follow-up study may be written to investigate those differences more fully.

### **12.2 STRATEGIES/PROCEDURES FOR RECRUITMENT**

Patients for this protocol will be recruited via standard CCR mechanisms as well as various advertising venues. All advertisements, letters and other recruitment efforts will be submitted to the IRB for approval prior to their implementation.

### **12.3 PARTICIPATION OF CHILDREN**

The use of the non-myeloablative regimen in this protocol entails serious discomforts and hazards for the patient, such that fatal complications are possible. It is therefore only appropriate to carry out this experimental procedure in the context of life threatening metastatic cancer. Since the efficacy of this experimental procedure is unknown, it does not seem reasonable to expose children to this risk without further evidence of benefit. Should results of this study indicate efficacy in treating metastatic cancer, which is not responsive to other standard forms of therapy, future research can be conducted in the pediatric population to evaluate potential benefit in that patient population.

### **12.4 PARTICIPATION OF SUBJECTS UNABLE TO GIVE CONSENT**

Adults unable to give consent are excluded from enrolling in the protocol. However re-consent may be necessary and there is a possibility, though unlikely, that subjects could become decisionally impaired. For this reason and because there is a prospect of direct benefit from research participation (section 10.6), all subjects will be offered the opportunity to fill in their wishes for research and care, and assign a substitute decision maker on the “NIH Advance Directive for Health Care and Medical Research Participation” form so that another person can make decisions about their medical care in the event that they become incapacitated or cognitively impaired during the course of the study. Note: The PI or AI will contact the NIH Ability to Consent Assessment Team (ACAT) for evaluation as needed for the following: an independent assessment of whether an individual has the capacity to provide consent; assistance in identifying and assessing an appropriate surrogate when indicated; and/or an assessment of the capacity to appoint a surrogate. For those subjects that become incapacitated and do not have pre-determined substitute decision maker, the procedures described in MEC Policy 87-4 and NIH HRPP SOP 14E for appointing a surrogate decision maker for adult subjects who are (a) decisionally impaired, and (b) who do not have a legal guardian or durable power of attorney, will be followed.

### **12.5 EVALUATION OF BENEFITS AND RISKS/DISCOMFORTS**

The experimental treatment has a chance to provide clinical benefit though it is not known if it will do so.

Over 400 patients have been treated in the Surgery Branch, NCI with TIL. Early toxicities related specifically to the infusion of the cells (those which are seen immediately following cell infusion and prior to aldesleukin administration) are generally mild and include fevers, chills, headache, and malaise. Toxicities which occur following administration of aldesleukin but are thought to be related to the cells include immune mediated events such as vitiligo, transient uveitis, hearing loss and vestibular dysfunction. The use of the non-myeloablative regimen prior to cell administration increases the toxicity of this treatment as profound myelosuppression occurs in all patients. In 93 patients treated with TIL using the non-myeloablative chemotherapy regimen with or without total body irradiation, there was one treatment related death (NMA + 200 cGy TBI) due to an unexpected but preexisting diverticular abscess. In the 101 patients treated in a subsequent randomized trial, 2 treatment-related deaths occurred – both due to the TBI component of the treatment regimen.

The standard approach to the administration of high-dose aldesleukin in all studies is to continue dosing until Grade 3 or 4 events occur. The most commonly seen Grade 4 events are pulmonary

and renal impairment, and mental status changes. These toxicities may sometimes require intubation for protection of the patient's airway. It is important to note that although these patients require significant supportive measures during this period, all toxicities are reversible and the overwhelming majority of patients have suffered no long term sequelae following this treatment regimen. However, fatal complications are possible and it is therefore only appropriate to carry out this experimental treatment in the context of life threatening metastatic cancer.

Toxicities seen on protocols using this non-myeloablative regimen and aldesleukin that occur during the follow up period are rare but have included EBV lymphoma following prolonged lymphopenia, herpes zoster infection, and sensory neuropathy likely related to fludarabine.

The major discomforts of the research are those of nausea and vomiting, mucositis, anorexia, diarrhea, fever and malaise. Side effects of common drugs used in this regimen include:

- Cyclophosphamide: Marrow suppression, nausea, mucositis, rash, hemorrhagic cystitis, myocardial damage, alopecia, infertility, nausea and vomiting, SIADH.
- Fludarabine: Myelosuppression, fever and chills, nausea and vomiting, malaise, fatigue, anorexia, weakness, neurologic toxicity, and interstitial pneumonitis. Serious opportunistic infections have occurred in CLL patients treated with fludarabine.
- Antimicrobials in general: Allergic reactions, renal impairment, nausea, vomiting, hepatic damage, marrow suppression, photosensitivity.
- High-dose aldesleukin administration: A listing of these side effects in 525 patients who received 1,039 treatment courses are listed in [Appendix 3](#).

The risks associated with biopsies are pain and bleeding at the biopsy site. In order to minimize pain, local anesthesia will be used. Rarely, there is a risk of infection at the sampling site. CT guidance may be used in obtaining biopsies. If so, there will also be a risk of exposure to radiation from up to 3 CT scans. This radiation exposure is not required for medical care and is for research purposes only. The amount of radiation received in this study is 0.43 rem which is below the guideline of 5 rem per year allowed for research subjects by the NIH Radiation Safety Committee.

## **12.6 RISKS/BENEFITS ANALYSIS**

The success of this effort cannot be predicted at this time. Since all patients in this protocol have metastatic or recurrent/refractory locally advanced HPV16-associated cancer and limited life expectancies the potential benefit is thought to outweigh the potential risks.

### **12.6.1 Adult Patients (including who are or may become unable to consent)**

As outlined above, although there is prospect of direct benefits to individual subjects. We believe that procedures performed on this study will pose more than a minimal risk to the patients.

## **12.7 CONSENT PROCESS AND DOCUMENTATION**

The patient, along with family members or friends, will be presented with a detailed description of the protocol treatment. The specific requirements, objectives, and potential advantages and disadvantages will be presented. The Informed Consent document is given to the patient who is requested to review it and to ask questions prior to agreeing to participate in the treatment portion of this protocol. The patient will be reassured that participation on trial is entirely voluntary and



that he/she can withdraw or decide against treatment at any time without adverse consequences. The research nurse, Principal Investigator or his designee is responsible for obtaining written informed consent from the patient.

Consent for screening and re-consent on this study may be obtained via telephone. Telephone consent will be obtained and documented per OHSRP/IRBO and CCR policies and procedures. For the optional biopsies, patients will be required to sign a separate consent for all biopsies at the time of the procedure. If the patient refuses the optional biopsy at that time, the refusal will be documented in the medical record.

During the screening consent process, the patient will be asked to indicate whether they wish to participate in the optional blood draw for the research test for HPV-16 tumor genotyping. The patient's decision will be documented in the medical record and in the research record.

#### 12.7.1 Request for Waiver of Consent for Screening Activities

Prior to the subject signing the consent for this study pre-screening activities listed in section **2.2.1** may be performed.

We request a waiver of consent for these activities as they involve only minimal risk to the subjects. A waiver will not adversely affect the rights and welfare of the subjects given that the activities are only intended to determine suitability for screening for participation in research protocols. These activities could not practicably be carried out without the waiver as central recruiting services, utilized in the NIH Clinical Center, perform pre-screening activities for multiple studies and obtaining consent for each one is beyond their resources. The subjects will be provided with additional pertinent information after participation as they will be informed whether or not they are eligible to sign a consent for additional screening.

### **13 PHARMACEUTICAL INFORMATION**

#### **13.1 INTERLEUKIN-2 (ALDESLEUKIN, PROLEUKIN, RECOMBINANT HUMAN INTERLEUKIN 2)**

##### 13.1.1 How Supplied

Aldesleukin (interleukin-2) will be provided by the NIH Clinical Pharmacy Department from commercial sources.

##### 13.1.2 Formulation/Reconstitution

Aldesleukin, NSC #373364, is provided as single-use vials containing 22 million IU (~1.3mg) IL-2 as a sterile, white to off-white lyophilized cake plus 50mg mannitol and 0.18 mg sodium dodecyl sulfate, buffered with approximately 0.17 mg monobasic and 0.89 mg dibasic sodium phosphate to a pH of 7.5 (range 7.2 to 7.8). The vial is reconstituted with 1.2 mL of Sterile Water for Injection, USP, and the resultant concentration is 18 million IU/mL or 1.1 mg/mL. Diluent should be directed against the side of the vial to avoid excess foaming. Swirl contents gently until completely dissolved. Do not shake. Since vials contain no preservative, reconstituted solution should be used within 24 hours.

##### 13.1.3 Storage

Intact vials are stored in the refrigerator (2 to 8C) protected from light. Each vial bears an expiration date.

#### 13.1.4 Dilution/Stability

Reconstituted aldesleukin should be further diluted with 50 mL of 5% Human Serum Albumin (HSA). The HAS should be added to the diluent prior to the addition of IL-2. Dilutions of the reconstituted solution over a 1000-fold range (i.e., 1 mg/mL to 1 mcg/mL) are acceptable in either glass bottles or polyvinyl chloride bags. Aldesleukin is chemically stable for 48 hours at refrigerated and room temperatures, 2 to 30C.

#### 13.1.5 Administration

The dosage will be calculated based on total body weight. The final dilution of aldesleukin will be infused over 15 minutes. Aldesleukin will be administered as an inpatient.

#### 13.1.6 Toxicities:

Expected toxicities of aldesleukin are listed in the product label and in [Appendix 2](#). Grade 3 toxicities common to aldesleukin include diarrhea, nausea, vomiting, hypotension, skin changes, anorexia, mucositis, dysphagia, or constitutional symptoms and laboratory changes as detailed in [Appendix 1](#). Additional Grade 3 and 4 toxicities seen with aldesleukin are detailed in [Appendix 2](#).

### 13.2 FLUDARABINE

(Please refer to package insert for complete product information)

#### 13.2.1 Description

Fludarabine phosphate is a synthetic purine nucleoside that differs from physiologic nucleosides in that the sugar moiety is arabinose instead of ribose or deoxyribose. Fludarabine is a purine antagonist antimetabolite.

#### 13.2.2 How Supplied

It will be purchased by the NIH Clinical Pharmacy Department from commercial sources. Fludarabine is supplied in a 50 mg vial as a fludarabine phosphate powder in the form of a white, lyophilized solid cake.

#### 13.2.3 Stability

Following reconstitution with 2 mL of sterile water for injection to a concentration of 25 mg/mL, the solution has a pH of 7.7. The fludarabine powder is stable for at least 18 months at 2 to 8C; when reconstituted, fludarabine is stable for at least 16 days at room temperature. Since no preservative is present, reconstituted fludarabine will typically be administered within 8 hours. Specialized references should be consulted for specific compatibility information. Fludarabine is dephosphorylated in serum, transported intracellularly and converted to the nucleotide fludarabine triphosphate; this 2-fluoro-ara-ATP molecule is thought to be required for the drug's cytotoxic effects. Fludarabine inhibits DNA polymerase, ribonucleotide reductase, DNA primase, and may interfere with chain elongation, and RNA and protein synthesis.

#### 13.2.4 Storage

Intact vials should be stored refrigerated (2 to 8C).

### 13.2.5 Administration

Fludarabine is administered as an IV infusion in 100 mL 0.9% sodium chloride, USP over 15 to 30 minutes. The doses will be based on body surface area (BSA). If patient is obese (BMI >35), drug dosage will be calculated using practical weight as described in [Table 3](#).

**Table 3. Modification of Dose Calculations\* in patients whose BMI is greater than 35**

**1. BMI Determination:**

$$\text{BMI} = \text{weight (kg)} / [\text{height (m)}]^2$$

**2. Calculation of ideal body weight**

$$\text{Male} = 50\text{kg} + 2.3 (\text{number of inches over 60 inches})$$

Example: ideal body weight of 5'10" male

$$50 + 2.3 (10) = 73 \text{ kg}$$

$$\text{Female} = 45.5\text{kg} + 2.3 (\text{number of inches over 60 inches})$$

Example: ideal body weight of a 5'3" female

$$45.5 + 2.3 (3) = 57\text{kg}$$

**3. Calculation of "practical weight"**

Calculate the average of the actual and the ideal body weights. This is the practical weight to be used in calculating the doses of chemotherapy and associated agents designated in the protocol.

### 13.2.6 Toxicities

At doses of 25 mg/m<sup>2</sup>/day for 5 days, the primary side effect is myelosuppression; however, thrombocytopenia is responsible for most cases of severe and life-threatening hematologic toxicity. Serious opportunistic infections have occurred in CLL patients treated with fludarabine. Hemolytic anemia has been reported after 1 or more courses of fludarabine with or without a prior history of a positive Coomb's test; fatal hemolytic anemia has been reported. In addition, bone marrow fibrosis has been observed after fludarabine therapy. Other common adverse effects and potentially fatal central nervous system toxicity in the form of progressive encephalopathy, blindness, and coma is only rarely observed at the currently administered doses of fludarabine. More common neurologic side effects at the current doses of fludarabine include weakness, pain, malaise, fatigue, paresthesia, visual or hearing disturbances, and sleep disorders. Adverse respiratory effects of fludarabine include, cough, dyspnea, allergic or idiopathic interstitial pneumonitis. Tumor lysis syndrome has been rarely observed in fludarabine treatment of CLL. Treatment on previous adoptive cell therapy protocols in the Surgery Branch have caused persistently low (below 200) CD4 counts, and 1 patient developed polyneuropathy manifested by vision blindness, and motor and sensory defects.

Unless otherwise specified in this protocol, actual body weight is used for dose calculations of treatment agents. In patients who are determined to be obese (BMI >35), the practical weight (see 3 below) will be used.

### **13.3 CYCLOPHOSPHAMIDE**

(Refer to FDA-approved package insert for complete product information)

#### **13.3.1 Description**

Cyclophosphamide is a nitrogen mustard-derivative alkylating agent. Following conversion to active metabolites in the liver, cyclophosphamide functions as an alkylating agent; the drug also possesses potent immunosuppressive activity. The serum half-life after IV administration ranges from 3 to 12 hours; the drug and/or its metabolites can be detected in the serum for up to 72 hours after administration.

#### **13.3.2 How Supplied**

Cyclophosphamide will be obtained from commercially available sources by the Clinical Center Pharmacy Department.

#### **13.3.3 Stability**

Following reconstitution as directed with sterile water for injection, cyclophosphamide is stable for 24 hours at room temperature or 6 days when kept at 2 to 8C.

#### **13.3.4 Administration**

It will be diluted in 250 mL D5W and infused over 1 hour. The dose will be based on the patient's body weight. If patient is obese (BMI>35) drug dosage will be calculated using practical weight as described in [Table 3](#).

#### **13.3.5 Toxicities**

Hematologic toxicity occurring with cyclophosphamide usually includes leukopenia and thrombocytopenia. Anorexia, nausea and vomiting, rash and alopecia occur, especially after high-dose cyclophosphamide; diarrhea, hemorrhagic colitis, infertility, and mucosal and oral ulceration have been reported. Sterile hemorrhagic cystitis occurs in about 20% of patients; severity can range from microscopic hematuria to extensive cystitis with bladder fibrosis. Although the incidence of hemorrhagic cystitis associated with cyclophosphamide appears to be lower than that associated with ifosfamide, mesna (sodium 2-mercaptoethanesulfonate) has been used prophylactically as an uroprotective agent in patients receiving cyclophosphamide. Prophylactic mesna is not effective in preventing hemorrhagic cystitis in all patients. Patients who receive high dose cyclophosphamide may develop interstitial pulmonary fibrosis, which can be fatal. Hyperuricemia due to rapid cellular destruction may occur, particularly in patients with hematologic malignancy. Hyperuricemia may be minimized by adequate hydration, alkalinization of the urine, and/or administration of allopurinol. If allopurinol is administered, patients should be watched closely for cyclophosphamide toxicity (due to allopurinol induction of hepatic microsomal enzymes). At high doses, cyclophosphamide can result in a syndrome of inappropriate antidiuretic hormone secretion; hyponatremia with progressive weight gain without edema occurs. At high doses, cyclophosphamide can result in cardiotoxicity. Deaths have occurred from diffuse hemorrhagic myocardial necrosis and from a syndrome of acute myopericarditis; in such cases,

congestive heart failure may occur within a few days of the first dose. Other consequences of cyclophosphamide cardiotoxicity include arrhythmias, potentially irreversible cardiomyopathy, and pericarditis. Other reported adverse effects of cyclophosphamide include headache, dizziness, and myxedema; faintness, facial flushing, and diaphoresis have occurred following IV administration. Mesna (sodium 2-mercaptoethanesulphonate; given by IV injection) is a synthetic sulfhydryl compound that can chemically interact with urotoxic metabolites of cyclophosphamide (acrolein and 4-hydroxycyclophosphamide) to decrease the incidence and severity of hemorrhagic cystitis.

### **13.4 CELL PREPARATION (E7 TCR TRANSDUCED PBL)**

The procedure for the expanding the human PBL and the Certificate of Analysis (CoA) are similar to those approved by the Food and Drug Administration, and used at the NCI in ongoing protocols. The CoA is included in **APPENDIX 4**. The PBL will be transduced with retroviral supernatant containing the E7 TCR.

#### **13.4.1 Retroviral Vector Containing the E7 TCR gene**

The retroviral vector supernatant (PG13-MSGV1-E7-TCR) encoding a T cell receptor directed against HPV16 E7<sub>11-19</sub>) was prepared and preserved following cGMP conditions in the Surgery Branch Vector Production Facility (SBVPF). The E7 TCR vector was produced by the Surgery Branch Vector Production Facility. The backbone is the MSGV1 retrovirus that has been used in prior gene therapy clinical trials. It was produced using a PG13-based packaging line.

The retroviral vector E7 TCR consists of 7,310 bps including the 5'LTR from the murine stem cell virus (promoter), packaging signal including the splicing donor (SD) and splicing acceptor sites, alpha and beta chain genes of the E7 TCR. The alpha and beta chains are linked by a P2A peptide. The vector was codon optimized for expression by human cells with constant region exchanged for murine counterparts with an added disulfide bond and hydrophobic substitutions in the alpha chain constant region transmembrane domain.

The physical titer will be determined by transduction of PBL with serial dilutions of the vector. TCR expression on the cell surface will be measured using FACS following staining with an anti-mouse constant region antibody. The titer will be measured as transducing units per milliliter. Portions of the supernatant will be stored at -80C at Surgery Branch, NCI, American Type Culture Collection (ATCC), Rockville, MD, and the NIH Clinical Center Department of Transfusion Medicine. These storage facilities are equipped with around-the-clock temperature monitoring. Upon request, supernatant will be delivered on dry ice to be used in *ex vivo* transduction of patient PBL. There will be no re-use of the same unit of supernatant for different patients. Retroviral titer has been shown to be stable after immediate thawing and immediate administration (coating the tissue culture wells previously coated with Retronectin). Handling of the vector should follow the guidelines of Biosafety Level-2 (BSL-2). The specific guidelines for Biosafety Level-2 (BSL-2) can be viewed at <https://www.cdc.gov/labs/pdf/CDC-BiosafetyMicrobiologicalBiomedicalLaboratories-2009-P.PDF> (section IV).

### **13.5 MESNA**

(Sodium 2-mercaptoethanesulfonate, Mesnum, Mesnex, NSC-113891);  
(Please refer to the FDA-approved package insert for complete product information)

### 13.5.1 How Supplied

Mesna will be obtained commercially by the Clinical Center Pharmacy Department and is supplied as a 100 mg/mL solution.

### 13.5.2 Storage

Intact ampules are stored at room temperature.

### 13.5.3 Stability

Diluted solutions (1 to 20 mg/mL) are physically and chemically stable for at least 24 hours under refrigeration. Mesna is chemically stable at room temperature for 48 to 72 hours in D5W, 48 to 72 hours in D5W/0.45% NaCl, or 24 hours in 0.9% NaCl.

### 13.5.4 Administration

Dilute to concentrations less than or equal to 20 mg Mesna/mL fluid in D5W or 0.9% NaCl and to be administered intravenously as a continuous infusion. If patient is obese (BMI >35) drug dosage will be calculated using practical weight as described in [Table 3](#).

### 13.5.5 Toxicities

Include nausea, vomiting, and diarrhea.

## 13.6 FILGRASTIM

(Granulocyte Colony-Stimulating Factor, G-CSF, Filgrastim, Neupogen):

### 13.6.1 How supplied

Filgrastim will be obtained commercially by the Clinical Center Pharmacy Department and is supplied in 300 ug/mL and 480 ug/1.6mL vials.

### 13.6.2 Storage

G-CSF should be refrigerated and not allowed to freeze. The product bears the expiration date. The product should not be shaken.

### 13.6.3 Stability

It is generally stable for at least 10 months when refrigerated.

### 13.6.4 Administration

The appropriate dose is drawn up into a syringe. G-CSF will be given as a daily subcutaneous injection.

### 13.6.5 Toxicities

The side effects of G-CSF are skin rash, myalgia, and bone pain, an increase of pre-existing inflammatory conditions, enlarged spleen with occasional associated low platelet counts, alopecia (with prolonged use) elevated blood chemistry levels.

### **13.7 TRIMETHOPRIM AND SULFAMETHOXAZOLE DOUBLE STRENGTH (TMP/SMX DS)**

#### 13.7.1 How supplied

TMP/SMX DS will be obtained by the Clinical Center Pharmacy Department from commercial sources.

It may be used for the prevention of PCP pneumonia.

#### 13.7.2 Administration

The oral dose is 1 tablet PO daily 3 times a week (MUST be on non-consecutive days) beginning at or near the time of discharge from the hospital and continuing for at least 6 months and until the CD4 count is greater than 200 on 2 consecutive lab studies.

#### 13.7.3 Toxicities

Like other sulfa drugs, TMP/SMX DS can cause allergies, fever, photosensitivity, nausea, and vomiting. Allergies typically develop as a widespread itchy red rash with fever 8 to 14 days after beginning the standard dose. Neutropenia, a reduction in the number of neutrophils, can also occur.

### **13.8 AEROSOLIZED PENTAMIDINE IN PLACE OF TMP/SMX DS**

Patients with sulfa allergies may receive aerosolized Pentamidine 300 mg per nebulizer at or around the time of discharge from the hospital and continued monthly until the CD4 count is above 200 on 2 consecutive follow up lab studies and for at least 6 months post chemotherapy. Pentamidine Isethionate will be obtained by the Clinical Center Pharmacy Department from commercial sources. It will be used to prevent the occurrence of PCP infections. It is supplied in 300 mg vials of lyophilized powder and will be administered via nebulizer. Toxicities reported with the use of Pentamidine include metallic taste, coughing, bronchospasm in heavy smokers and asthmatics; increased incidence of spontaneous pneumothorax in patients with previous PCP infection or pneumatoceles, or hypoglycemia.

### **13.9 HERPES VIRUS PROPHYLAXIS**

#### 13.9.1 Valacyclovir (Valtrex)

Valacyclovir will be obtained by the Clinical Center Pharmacy Department from commercial sources. It may be used orally to prevent the occurrence of herpes virus infections in patients with positive HSV serology. It is supplied in 500 mg tablets. Valacyclovir will be started the day after the last dose of fludarabine at a dose of 500 mg orally daily if the patient is able to tolerate oral intake. See package insert for dosing adjustments in patients with renal impairment. Common side effects include headache, upset stomach, nausea, vomiting, diarrhea, or constipation. Rare serious side effects include hemolytic uremic syndrome and thrombotic thrombocytopenic purpura.

#### 13.9.2 Acyclovir

Acyclovir will be obtained by the Clinical Center Pharmacy Department from commercial sources. It may be used to prevent the occurrence of herpes virus infections in patients who cannot take oral medications. It is supplied as powder for injection in 500 mg/vials. Reconstitute in 10 mL of sterile water for injection to a concentration of 50 mg/mL. Reconstituted solutions should be used

within 12 hours. IV solutions should be diluted to a concentration of 7 mg/mL or less and used within 12 hours. IV solutions should be diluted to a concentration of 7 mg/mL or less and infused over 1 hour to avoid renal damage. Reversible renal insufficiency has been reported with IV but not oral acyclovir. Neurologic toxicity including delirium, tremors, coma, acute psychiatric disturbances, and abnormal EEGs have been reported with higher doses of acyclovir. Should this occur, a dosage adjustment will be made or the drug will be discontinued. Stomach upset, headache or nausea, rash or hives; peripheral edema; pain, elevated liver function tests; and leukopenia, diarrhea, lymphadenopathy, myalgias, visual abnormalities and elevated creatinine have been reported. Hair loss from prolonged use has been reported. Acyclovir will not be used concomitantly with other nucleoside analogs that interfere with DNA synthesis, e.g. ganciclovir. In renal disease, the dose is adjusted as per product labeling.

### **13.10 FUNGAL PROPHYLAXIS**

#### **13.10.1 Fluconazole**

Fluconazole will be obtained by the Clinical Center Pharmacy Department from commercial sources. It can be used as prophylaxis against fungal infections. It is available in 200 mg tablets. It can cause headache, nausea, vomiting, diarrhea, or abdominal pain, and liver damage which may be irreversible. It can cause rashes and itching, which in rare cases has caused Stevens Johnson Syndrome. It has several significant drug interactions. The package insert should be consulted prior to prescribing. For IV administration in patients who cannot tolerate the oral preparation, Fluconazole comes in 2 mg/mL solution for injection, and prepared according to Clinical Center Pharmacy standard procedures. It should be administered at a maximum IV rate of 200 mg/hr.

### **13.11 SUPPORT MEDICATIONS**

#### **13.11.1 Ondansetron hydrochloride**

Ondansetron hydrochloride will be obtained by the Clinical Center Pharmacy Department from commercial sources. It will be used to control nausea and vomiting during the chemotherapy preparative regimen. It can cause headache, dizziness, myalgias, drowsiness, malaise, and weakness. Less common side effects include chest pain, hypotension, pruritus, constipation and urinary retention. Consult the package insert for specific dosing instructions.

#### **13.11.2 Furosemide**

Furosemide will be obtained by the Clinical Center Pharmacy Department from commercial sources. It will be used to enhance urine output during the chemotherapy preparative regimen with cyclophosphamide. Adverse effects include dizziness, vertigo, paresthesias, weakness, orthostatic hypotension, photosensitivity, rash, and pruritus. Consult the package insert for a complete list of all side effects.



## 14 REFERENCES

1. Hinrichs CS, Rosenberg SA. Exploiting the curative potential of adoptive T-cell therapy for cancer. *Immunol Rev.* 2014;257(1):56-71.
2. Hinrichs CS, Restifo NP. Reassessing target antigens for adoptive T-cell therapy. *Nat Biotechnol.* 2013;31(11):999-1008.
3. Chaturvedi AK, Engels EA, Pfeiffer RM, Hernandez BY, Xiao W, Kim E, et al. Human papillomavirus and rising oropharyngeal cancer incidence in the United States. *J Clin Oncol.* 2011;29(32):4294-301.
4. Cancer Facts & Figures 2010. Atlanta: American Cancer Society, 2010.
5. Gillison ML, Chaturvedi AK, Lowy DR. HPV prophylactic vaccines and the potential prevention of noncervical cancers in both men and women. *Cancer.* 2008;113(10 Suppl):3036-46.
6. Ryerson AB, Peters ES, Coughlin SS, Chen VW, Gillison ML, Reichman ME, et al. Burden of potentially human papillomavirus-associated cancers of the oropharynx and oral cavity in the US, 1998-2003. *Cancer.* 2008;113(10 Suppl):2901-9.
7. Long HJ, 3rd, Bundy BN, Grendys EC, Jr., Benda JA, McMeekin DS, Sorosky J, et al. Randomized phase III trial of cisplatin with or without topotecan in carcinoma of the uterine cervix: a Gynecologic Oncology Group Study. *J Clin Oncol.* 2005;23(21):4626-33.
8. Vermorken JB, Mesia R, Rivera F, Remenar E, Kawecki A, Rottey S, et al. Platinum-based chemotherapy plus cetuximab in head and neck cancer. *N Engl J Med.* 2008;359(11):1116-27.
9. Long HJ, 3rd. Management of metastatic cervical cancer: review of the literature. *J Clin Oncol.* 2007;25(20):2966-74.
10. Monk BJ, Sill MW, McMeekin DS, Cohn DE, Ramondetta LM, Boardman CH, et al. Phase III trial of four cisplatin-containing doublet combinations in stage IVB, recurrent, or persistent cervical carcinoma: a Gynecologic Oncology Group study. *J Clin Oncol.* 2009;27(28):4649-55.
11. Tewari KS, Sill MW, Long HJ, 3rd, Penson RT, Huang H, Ramondetta LM, et al. Improved survival with bevacizumab in advanced cervical cancer. *N Engl J Med.* 2014;370(8):734-43.
12. Monk BJ, Sill MW, Burger RA, Gray HJ, Buekers TE, Roman LD. Phase II trial of bevacizumab in the treatment of persistent or recurrent squamous cell carcinoma of the cervix: a gynecologic oncology group study. *J Clin Oncol.* 2009;27(7):1069-74.
13. Vermorken JB, Trigo J, Hitt R, Koralewski P, Diaz-Rubio E, Rolland F, et al. Open-label, uncontrolled, multicenter phase II study to evaluate the efficacy and toxicity of cetuximab as a single agent in patients with recurrent and/or metastatic squamous cell carcinoma of the head and neck who failed to respond to platinum-based therapy. *J Clin Oncol.* 2007;25(16):2171-7.

14. Stevanovic S, Draper LM, Langan MM, Campbell TE, Kwong ML, Wunderlich JR, et al. Complete regression of metastatic cervical cancer after treatment with human papillomavirus-targeted tumor-infiltrating T cells. *J Clin Oncol.* 2015;33(14):1543-50.
15. Draper LM, Kwong ML, Gros A, Stevanovic S, Tran E, Kerkar S, et al. Targeting of HPV-16+ Epithelial Cancer Cells by TCR Gene Engineered T Cells Directed against E6. *Clin Cancer Res.* 2015;21(19):4431-9.
16. Riemer AB, Keskin DB, Zhang G, Handley M, Anderson KS, Brusica V, et al. A conserved E7-derived cytotoxic T lymphocyte epitope expressed on human papillomavirus 16-transformed HLA-A2+ epithelial cancers. *J Biol Chem.* 2010;285(38):29608-22.
17. Cohen CJ, Li YF, El-Gamil M, Robbins PF, Rosenberg SA, Morgan RA. Enhanced antitumor activity of T cells engineered to express T-cell receptors with a second disulfide bond. *Cancer Res.* 2007;67(8):3898-903.
18. Haga-Friedman A, Horovitz-Fried M, Cohen CJ. Incorporation of transmembrane hydrophobic mutations in the TCR enhance its surface expression and T cell functional avidity. *J Immunol.* 2012;188(11):5538-46.
19. Robbins PF, Morgan RA, Feldman SA, Yang JC, Sherry RM, Dudley ME, et al. Tumor regression in patients with metastatic synovial cell sarcoma and melanoma using genetically engineered lymphocytes reactive with NY-ESO-1. *J Clin Oncol.* 2011;29(7):917-24.
20. Johnson LA, Morgan RA, Dudley ME, Cassard L, Yang JC, Hughes MS, et al. Gene therapy with human and mouse T-cell receptors mediates cancer regression and targets normal tissues expressing cognate antigen. *Blood.* 2009;114(3):535-46.
21. Dudley ME, Wunderlich JR, Yang JC, Sherry RM, Topalian SL, Restifo NP, et al. Adoptive cell transfer therapy following non-myeloablative but lymphodepleting chemotherapy for the treatment of patients with refractory metastatic melanoma. *J Clin Oncol.* 2005;23(10):2346-57.
22. Eisenhauer EA, Therasse P, Bogaerts J, Schwartz LH, Sargent D, Ford R, et al. New response evaluation criteria in solid tumours: revised RECIST guideline (version 1.1). *Eur J Cancer.* 2009;45(2):228-47.
23. Costelloe CM, Chuang HH, Madewell JE, Ueno NT. Cancer Response Criteria and Bone Metastases: RECIST 1.1, MDA and PERCIST. *J Cancer.* 2010;1:80-92.

**15 APPENDIX 1: ADVERSE EVENTS OCCURRING IN ≥10% OF PATIENTS TREATED WITH ALDESLEUKIN (N=525)<sup>1</sup>**

| <b>Body System</b>                   | <b>% Patients</b> | <b>Body System</b>                                | <b>% Patients</b> |
|--------------------------------------|-------------------|---------------------------------------------------|-------------------|
| <u><i>Body as a Whole</i></u>        |                   | <u><i>Metabolic and Nutritional Disorders</i></u> |                   |
| Chills                               | 52                | Bilirubinemia                                     | 40                |
| Fever                                | 29                | Creatinine increase                               | 33                |
| Malaise                              | 27                | Peripheral edema                                  | 28                |
| Asthenia                             | 23                | SGOT increase                                     | 23                |
| Infection                            | 13                | Weight gain                                       | 16                |
| Pain                                 | 12                | Edema                                             | 15                |
| Abdominal pain                       | 11                | Acidosis                                          | 12                |
| Abdomen enlarged                     | 10                | Hypomagnesemia                                    | 12                |
| <u><i>Cardiovascular</i></u>         |                   | Hypocalcemia                                      | 11                |
| Hypotension                          | 71                | Alkaline phosphatase incr                         | 10                |
| Tachycardia                          | 23                | <u><i>Nervous</i></u>                             |                   |
| Vasodilation                         | 13                | Confusion                                         | 34                |
| Supraventricular tachycardia         | 12                | Somnolence                                        | 22                |
| Cardiovascular disorder <sup>a</sup> | 11                | Anxiety                                           | 12                |
| Arrhythmia                           | 10                | Dizziness                                         | 11                |
| <u><i>Digestive</i></u>              |                   | <u><i>Respiratory</i></u>                         |                   |
| Diarrhea                             | 67                | Dyspnea                                           | 43                |
| Vomiting                             | 50                | Lung disorder <sup>b</sup>                        | 24                |
| Nausea                               | 35                | Respiratory disorder <sup>c</sup>                 | 11                |
| Stomatitis                           | 22                | Cough increase                                    | 11                |
| Anorexia                             | 20                | Rhinitis                                          | 10                |
| Nausea and vomiting                  | 19                | <u><i>Skin and Appendages</i></u>                 |                   |
| <u><i>Hemic and Lymphatic</i></u>    |                   | Rash                                              | 42                |
| Thrombocytopenia                     | 37                | Pruritus                                          | 24                |
| Anemia                               | 29                | Exfoliative dermatitis                            | 18                |
| Leukopenia                           | 16                | <u><i>Urogenital</i></u>                          |                   |
|                                      |                   | Oliguria                                          | 63                |

a Cardiovascular disorder: fluctuations in blood pressure, asymptomatic ECG changes, CHF.

b Lung disorder: physical findings associated with pulmonary congestion, rales, rhonchi.

c Respiratory disorder: ARDS, CXR infiltrates, unspecified pulmonary changes.

<sup>1</sup>Source: Proleukin® Prescribing Information – June 2007

*Abbreviated Title: HPV-16 E7 TCR*  
*Version Date: 3/5/2020*

## 16 APPENDIX 2: EXPECTED IL-2 TOXICITIES AND THEIR MANAGEMENT

| Toxicity                 | Grade  | Supportive Medications                                                                                                                          | Stop Cycle*                                               | Stop Treatment** |
|--------------------------|--------|-------------------------------------------------------------------------------------------------------------------------------------------------|-----------------------------------------------------------|------------------|
| Chills                   | 3      | IV Meperidine 25-50mg IV q1hr, prn                                                                                                              | No                                                        | No               |
| Fever                    | 3      | Acetaminophen 650mg po q4hr; Indomethacin 50-75mg po q8h                                                                                        | No                                                        | No               |
| Pruritus                 | 3      | Hydroxyzine HCl 10-20mg po q6h, prn; Diphenhydramine HCl 25-50mg po q4h prn                                                                     | No                                                        | No               |
| Nausea/Vomiting/Anorexia | 3      | Ondansetron 10mg IV q8hr prn, Granisetron 0.01 mg/kg IV qday prn, Droperidol 1mg IV a4-6h prn; Prochlorperazine 25mg PR prn or 10mg IV q6hr prn | No                                                        | No               |
| Diarrhea                 | 3      | Loperamide 2mg po q3h prn; Diphenoxylate HCl 2.5mg and Atropine sulfate 25mcg po q3h prn; Codeine sulfate 30-60mg po q4h prn                    | If uncontrolled after 24h despite all supportive measures | No               |
| Malaise                  | 3 or 4 | Bedrest                                                                                                                                         | If other toxicities occur simultaneously                  | No               |
| Hyperbilirubinemia       | 3 or 4 | Observation                                                                                                                                     | If other toxicities occur simultaneously                  | No               |
| Anemia                   | 3 or 4 | Transfusion with PRBCs                                                                                                                          | If uncontrolled despite all supportive measures           | No               |
| Thrombocytopenia         | 3 or 4 | Transfusion with platelets                                                                                                                      | If uncontrolled despite all                               | No               |

| Toxicity                 | Grade  | Supportive Medications                                                                               | Stop Cycle*                                     | Stop Treatment**                               |
|--------------------------|--------|------------------------------------------------------------------------------------------------------|-------------------------------------------------|------------------------------------------------|
|                          |        |                                                                                                      | supportive measures                             |                                                |
| Edema/Weight gain        | 3      | Diuretics prn                                                                                        | No                                              | No                                             |
| Hypotension              | 3      | Fluid resuscitation, Vasopressor support                                                             | If uncontrolled despite all supportive measures | No                                             |
| Dyspnea                  | 3 or 4 | Oxygen or ventilator support                                                                         | If requires ventilator support                  | No                                             |
| Oliguria                 | 3 or 4 | Fluid boluses or dopamine at renal doses                                                             | If uncontrolled despite all supportive measures | No                                             |
| Increased Creatinine     | 3 or 4 | Observation                                                                                          | Yes (Grade 4)                                   | No                                             |
| Renal Failure            | 3 or 4 | Dialysis/CVVH                                                                                        | Yes                                             | Yes                                            |
| Pleural Effusion         | 3      | Thoracentesis                                                                                        | If uncontrolled despite all supportive measures | No                                             |
| Bowel Perforation        | 3      | Surgical intervention                                                                                | Yes                                             | Yes                                            |
| Confusion                | 3      | Observation                                                                                          | Yes                                             | No                                             |
| Somnolence               | 3 or 4 | Intubation for airway protection                                                                     | Yes                                             | Yes                                            |
| Arrhythmia               | 3      | Correction of fluid and electrolyte imbalances; chemical conversion or electrical conversion therapy | If uncontrolled despite all supportive measures | No                                             |
| Elevated Troponin Levels | 3 or 4 | Observation                                                                                          | Yes                                             | If changes in LV function have not improved to |

| Toxicity               | Grade  | Supportive Medications  | Stop Cycle*                                     | Stop Treatment**                                      |
|------------------------|--------|-------------------------|-------------------------------------------------|-------------------------------------------------------|
|                        |        |                         |                                                 | baseline by next dose                                 |
| Myocardial Infarction  | 4      | Supportive care         | Yes                                             | Yes                                                   |
| Elevated Transaminases | 3 or 4 | Observation             | For Grade 4 without liver metastases            | If changes have not improved to baseline by next dose |
| Hyperbilirubinemia     | 3 or 4 | Observation             | For Grade 4 without liver metastases            | If changes have not improved to baseline by next dose |
| Electrolyte Imbalances | 3 or 4 | Electrolyte replacement | If uncontrolled despite all supportive measures | No                                                    |
| Neutropenia            | 4      | Observation             | No                                              | No                                                    |

\*Unless the toxicity is not reversed within 12 hours.

\*\*Unless the toxicity is not reversed to Grade 2 or less by next treatment.

## 17 APPENDIX 3: INTERLEUKIN-2 TOXICITIES OBSERVED IN PATIENTS TREATED AT THE NIH CLINICAL CENTER

TABLE 8. Toxicity of Treatment with Interleukin-2

| Interleukin-2 Plus                                     | Alone | TNF | a-IFN | MoAB | CYT | LAK | TIL | Total |
|--------------------------------------------------------|-------|-----|-------|------|-----|-----|-----|-------|
| Number of Patients                                     | 155   | 38  | 128   | 32   | 19  | 214 | 66  | 652*  |
| Number of Courses                                      | 236   | 85  | 210   | 35   | 30  | 348 | 95  | 1039  |
| Chills                                                 | 75    | 16  | 68    | 8    | 8   | 191 | 33  | 399   |
| Pruritus                                               | 53    | 9   | 26    | 2    | 2   | 82  | 6   | 180   |
| Necrosis                                               | 3     | —   | 2     | —    | —   | —   | —   | 5     |
| Anaphylaxis                                            | —     | —   | —     | 1    | —   | —   | —   | 1     |
| Mucositis (requiring liquid diet)                      | 6     | 1   | 7     | —    | 2   | 12  | 2   | 30    |
| Alimentation not possible                              | 1     | —   | 1     | —    | —   | 2   | —   | 4     |
| Nausea and vomiting                                    | 162   | 42  | 117   | 14   | 20  | 263 | 48  | 666   |
| Diarrhea                                               | 144   | 38  | 98    | 15   | 13  | 250 | 38  | 596   |
| Hyperbilirubinemia (maximum/mg %)                      |       |     |       |      |     |     |     |       |
| 2.1–6.0                                                | 126   | 49  | 97    | 21   | 18  | 190 | 46  | 547   |
| 6.1–10.0                                               | 49    | 3   | 12    | 8    | 9   | 72  | 26  | 179   |
| 10.1+                                                  | 26    | 1   | 4     | 3    | 1   | 40  | 8   | 83    |
| Oliguria                                               |       |     |       |      |     |     |     |       |
| <80 ml/8 hours                                         | 81    | 37  | 67    | 14   | 9   | 114 | 25  | 347   |
| <240 ml/24 hours                                       | 19    | —   | 2     | 3    | 1   | 12  | 5   | 42    |
| Weight gain (% body weight)                            |       |     |       |      |     |     |     |       |
| 0.0–5.0                                                | 106   | 23  | 65    | 8    | 9   | 117 | 49  | 377   |
| 5.1–10.0                                               | 78    | 41  | 111   | 22   | 10  | 148 | 26  | 436   |
| 10.1–15.0                                              | 43    | 17  | 26    | 3    | 9   | 62  | 15  | 175   |
| 15.1–20.0                                              | 7     | 3   | 8     | 1    | 1   | 15  | 3   | 38    |
| 20.1+                                                  | 2     | 1   | —     | 1    | 1   | 6   | 2   | 13    |
| Elevated creatinine (maximum/mg %)                     |       |     |       |      |     |     |     |       |
| 2.1–6.0                                                | 148   | 43  | 121   | 20   | 14  | 237 | 54  | 637   |
| 6.1–10.0                                               | 21    | 1   | 14    | 3    | —   | 34  | 12  | 85    |
| 10.1+                                                  | 5     | —   | 1     | 1    | —   | 2   | 1   | 10    |
| Hematuria (gross)                                      | —     | —   | —     | —    | —   | 2   | —   | 2     |
| Edema (symptomatic nerve or vessel compression)        | 4     | —   | 6     | —    | —   | 7   | —   | 17    |
| Tissue ischemia                                        | —     | —   | —     | —    | 1   | 1   | —   | 2     |
| Resp. distress:                                        |       |     |       |      |     |     |     |       |
| not intubated                                          | 17    | 1   | 9     | 4    | 1   | 28  | 7   | 67    |
| intubated                                              | 15    | —   | 6     | 3    | —   | 12  | 5   | 41    |
| Bronchospasm                                           | 2     | —   | 2     | —    | 1   | 4   | —   | 9     |
| Pleural effusion (requiring thoracentesis)             | 4     | 1   | —     | 1    | 2   | 8   | 1   | 17    |
| Somnolence                                             | 29    | 2   | 22    | 6    | 2   | 45  | 8   | 114   |
| Coma                                                   | 9     | 1   | 8     | —    | 2   | 8   | 5   | 33    |
| Disorientation                                         | 52    | 3   | 50    | 7    | 4   | 89  | 10  | 215   |
| Hypotension (requiring pressors)                       | 119   | 16  | 40    | 17   | 12  | 259 | 45  | 508   |
| Angina                                                 | 5     | 1   | 8     | —    | —   | 8   | —   | 22    |
| Myocardial infarction                                  | 4     | —   | 1     | —    | —   | 1   | —   | 6     |
| Arrhythmias                                            | 15    | 2   | 13    | 3    | —   | 39  | 6   | 78    |
| Anemia requiring transfusion (number units transfused) |       |     |       |      |     |     |     |       |
| 1–15                                                   | 77    | 16  | 53    | 9    | 6   | 176 | 40  | 377   |
| 6–10                                                   | 22    | 1   | 5     | 3    | 2   | 53  | 9   | 95    |
| 11–15                                                  | 4     | —   | 1     | —    | —   | 15  | 4   | 24    |
| 16+                                                    | 1     | —   | 1     | —    | —   | 11  | 1   | 14    |
| Thrombocytopenia (minimum/mm <sup>3</sup> )            |       |     |       |      |     |     |     |       |
| <20,000                                                | 28    | 1   | 2     | 4    | 6   | 71  | 19  | 131   |
| 20,001–60,000                                          | 82    | 11  | 62    | 14   | 12  | 150 | 30  | 361   |
| 60,001–100,000                                         | 53    | 36  | 76    | 11   | 8   | 79  | 22  | 285   |
| Central line sepsis                                    | 13    | —   | 7     | 1    | 4   | 36  | 2   | 63    |
| Death                                                  | 4     | —   | 1     | —    | —   | 3   | 2   | 10    |

\* Eleven patients are in two protocols.



**18 Appendix 4: CERTIFICATE OF ANALYSIS HPV-16 E7 TCR**

Date of preparation of final product:

Patient:

| <u>Tests performed on final product:</u><br><i>Test</i> | <i>Method</i>                         | <i>Limits</i>           | <i>Results</i> | <i>Initials/Date</i> |
|---------------------------------------------------------|---------------------------------------|-------------------------|----------------|----------------------|
| Cell viability <sup>1</sup>                             | Trypan blue exclusion                 | >70%                    |                |                      |
| Total viable cell number <sup>1</sup>                   | Visual microscopic count              | >1x10 <sup>9</sup>      |                |                      |
| TCR expression <sup>2</sup>                             | FACS analysis of the transduced cells | PBL, >10%               |                |                      |
| Microbiological studies                                 | Gram stain <sup>1,3</sup>             | No micro-organisms seen |                |                      |
|                                                         | Aerobic culture <sup>3,4</sup>        | No growth               |                |                      |
|                                                         | Fungal culture <sup>3,4</sup>         | No growth               |                |                      |
|                                                         | Anaerobic culture <sup>3,4</sup>      | No growth               |                |                      |
|                                                         | Mycoplasma test <sup>5</sup>          | Negative                |                |                      |
| Endotoxin                                               | Limulus assay <sup>1</sup>            | <5 E.U./kg              |                |                      |
| RCR                                                     | S+L- Assay <sup>4</sup>               | Negative                |                |                      |
|                                                         | RCR-PCR <sup>6</sup>                  |                         |                |                      |

<sup>1</sup>Performed on sample of the final product immediately prior to infusion. Results are available at the time of infusion.

<sup>2</sup>Performed 2 to 10 days post-transduction. Results are available at the time of infusion.

**Abbreviated Title: HPV-16 E7 TCR**  
**Version Date: 3/5/2020**

<sup>3</sup>Performed 2 to 4 days prior to infusion. Results are available at the time of infusion but may not be definitive.

<sup>4</sup>Sample collected from the final product prior to infusion. Results will not be available before cells are infused into the patient.

<sup>5</sup>Performed 2 to 10 days prior to infusion. Results are available at the time of infusion.

<sup>6</sup>Performed on sample approximately 1 to 4 days prior to infusion. Results are available at the time of infusion.

Prepared by: \_\_\_\_\_ Date: \_\_\_\_\_

QC sign-off: \_\_\_\_\_ Date: \_\_\_\_\_

Qualified Clinical or Laboratory Supervisor

**19 APPENDIX 5: ECOG PERFORMANCE STATUS SCALE**

| <b>ECOG Performance Status Scale*</b> |                                                                                                                                                                                       |
|---------------------------------------|---------------------------------------------------------------------------------------------------------------------------------------------------------------------------------------|
| <b>Grade</b>                          | <b>Descriptions</b>                                                                                                                                                                   |
| 0                                     | Normal activity. Fully active, able to carry on all pre-disease performance without restriction.                                                                                      |
| 1                                     | Symptoms, but ambulatory. Restricted in physically strenuous activity, but ambulatory and able to carry out work of a light or sedentary nature (e.g., light housework, office work). |
| 2                                     | In bed <50% of the time. Ambulatory and capable of all self-care, but unable to carry out any work activities. Up and about more than 50% of waking hours.                            |
| 3                                     | In bed >50% of the time. Capable of only limited self-care, confined to bed or chair more than 50% of waking hours.                                                                   |
| 4                                     | 100% bedridden. Completely disabled. Cannot carry on any self-care. Totally confined to bed or chair.                                                                                 |
| 5                                     | Dead.                                                                                                                                                                                 |

\* As published in Am. J. Clin. Oncol.: Oken, M.M., Creech, R.H., Tormey, D.C., Horton, J., Davis, T.E., McFadden, E.T., Carbone, P.P.: Toxicity And Response Criteria Of The Eastern Cooperative Oncology Group. Am J Clin Oncol 5:649-655, 1982.
